1 **Neuronal histone methyltransferase EZH2 regulates neuronal morphogenesis, synaptic plasticity,**  
2 **and cognitive behavior of mice**

3

4 Mei Zhang<sup>1,5</sup>, Yong Zhang<sup>2</sup>, Qian Xu<sup>2</sup>, Joshua Crawford<sup>3</sup>, Cheng Qian<sup>1</sup>, Guo-Hua Wang<sup>4</sup>, Eastman Lewis<sup>2</sup>,  
5 Philip Hall, Gül Dolen<sup>2</sup>, Richard L. Huganir<sup>2</sup>, Jiang Qian<sup>4</sup>, Xin-Zhong Dong<sup>2</sup>, Mikhail V. Pletnikov<sup>3</sup>,  
6 Chang-Mei Liu<sup>6,\*</sup>, Feng-Quan Zhou<sup>1,2,\*</sup>

7

8 <sup>1</sup>Department of Orthopaedic Surgery, <sup>2</sup>The Solomon H. Snyder Department of Neuroscience, <sup>3</sup>Department  
9 of Psychiatry and Behavioral Sciences, <sup>4</sup>Department of Ophthalmology, Johns Hopkins University School  
10 of Medicine, Baltimore, Maryland 21205, USA, <sup>5</sup>School of Life Sciences, University of Science and  
11 Technology of China, Hefei 230026, China. <sup>6</sup>State Key Laboratory of Reproductive Biology, Institute of  
12 Zoology, Chinese Academy of Sciences, Beijing 100190, China

13

14 \*Correspondence to Feng-Quan Zhou, Room 291, The John G. Rangos Sr. Bldg., 855 North Wolfe Street,  
15 Departments of Orthopaedic Surgery and Neuroscience, Johns Hopkins University School of Medicine,  
16 Baltimore, MD 21205, Email: [fzhou4@jhmi.edu](mailto:fzhou4@jhmi.edu), or to Chang-Mei Liu, State Key Laboratory of  
17 Reproductive Biology, Institute of Zoology, Chinese Academy of Sciences, Beijing 100190, China, Email:  
18 liuchm@ioz.ac.cn

19

20

21 **Running head:** Neuronal EZH2 regulates neuronal morphogenesis and cognition

22

23

24

25 **Abstract**

26 Recent studies showed that in the nervous system histone methyltransferase EZH2-mediated  
27 trimethylation of histone H3 lysine 27 (H3K27me3) acts to regulate neural stem cell proliferation and fate  
28 specificity through silencing different gene sets. Here we explored the function of EZH2 in early post-  
29 mitotic excitatory neurons by generating a neuronal specific *Ezh2* conditional knockout mouse line. The  
30 results showed that lack of neuronal EZH2 led to delayed neuronal migration, more complex dendritic  
31 arborization, and significantly increased dendritic spine density. RNA-sequencing (RNA-seq)  
32 experiments comparing control and *Ezh2* knockout neurons revealed that neuronal EZH2 regulated genes  
33 related to neuronal morphogenesis. In particular, *Pak3* was identified as a target gene suppressed by EZH2  
34 and H3K27me3, and expression of dominant negative PAK3 reversed *Ezh2* knockout-induced higher  
35 dendritic spine density. Lastly, lack of neuronal EZH2 resulted in impaired memory behaviors in adult  
36 mice. Our results demonstrated that neuronal EZH2 played important roles in controlling multiple steps  
37 of neuronal morphogenesis during development, which had long-lasting effects on cognitive function in  
38 adult mice.

39

40

41

42

43

44

45

46

## 47 **Introduction**

48 During the development of the central nervous system (CNS), post-mitotic neurons generated through  
49 neurogenesis undergo several steps of neuronal morphogenesis, including neuronal migration, neuronal  
50 polarization, axon growth/guidance, dendrite development, and synaptogenesis, to form the functional  
51 neural circuits. Disruptions in these processes are believed to cause many neurodevelopmental disorders,  
52 such as autism spectrum disorder (ASD), schizophrenia, and intellectual disability. Previous studies have  
53 extensively investigated the roles of extracellular guidance cues, their receptors and downstream signaling  
54 mediators, as well as cytoskeletal proteins, in regulation of these processes. Epigenetic regulation  
55 independent of DNA sequence is emerging to be a key cellular mechanism for coordinated regulation of  
56 functionally relevant gene expression in neural development. Interestingly, perturbation of several histone  
57 methyltransferases, such as *NSD1* (H3K36) and *MLL2* (H3K4), causes Sotos Syndrome and Kabuki  
58 Syndrome, respectively, both of which show intellectual disability (Douglas et al., 2003; Ng et al., 2010).  
59 It appears that these histone-modifying proteins are emerging as causes of neurodevelopmental disorders.

60 The polycomb repressive complex 2 (PRC2) is one of the two polycomb group proteins (PcG) that  
61 can methylate the H3 histone lysine 27 (H3K27me3) (Margueron and Reinberg, 2011). The mouse PRC2  
62 has 4 subunits: SUZ12, EED, EZH2, and RbAp48, among which EZH2 is the methyltransferase that  
63 trimethylates H3K27. In addition to methyltransferase, H3K27 methylation is also negatively regulated  
64 by 2 demethylases, JMJD3 and UTX which remove methyl groups specifically from H3K27 (Agger et al.,  
65 2007; De Santa et al., 2007; Hong et al., 2007; Lan et al., 2007). Previous studies have identified *EZH2*  
66 as one of the causative genes of the Weaver Syndrome, a developmental disorder characterized by  
67 macrocephaly, dysmorphic facial features, accelerated skeletal maturation, limb anomalies, development  
68 delay and intellectual disability (Gibson et al., 2012; Tatton-Brown et al., 2011). In addition, a genome-  
69 wide profiling of histone methylations has shown a significant difference in H3K27 methylation between

70 olfactory cells (with neuronal traits) obtained from the schizophrenia patients and those from control  
71 groups (Kano et al., 2012). Moreover, both *EZH2* and *JMJD3* have been identified as susceptible genes  
72 for ASD (Iossifov et al., 2012; Li et al., 2016). These facts prompted us to study the function of EZH2 and  
73 H3K27 methylation in early neuronal development of the brain.

74         The main function of PRC2 and H3K27 methylation is to epigenetically maintain gene silencing  
75 (Beisel and Paro, 2011). Previous studies in stem cell maintenance and differentiation suggested that  
76 PRC2 function to maintain cell identity at different stages of cell development (Hwang et al., 2014;  
77 Margueron and Reinberg, 2011; Pereira et al., 2010; Schoeftner et al., 2006). For instance, in stem cells,  
78 H3K27me3 represses the expression of differentiation-related genes to maintain stem cell fate. When stem  
79 cells differentiate into specific cell types in response to extracellular signals, H3K27me3 instead represses  
80 stem cell genes and genes related to other cell types. Thus, H3K27me3 acts to repress different sets of  
81 genes in the same cell lineage at different developmental stages. EZH2 is highly expressed in dividing  
82 neural progenitors, and loss of EZH2 in neural progenitor cells disrupts neurogenesis in both embryonic  
83 and adult animals (Pereira et al., 2010; Zhang et al., 2014). When neural progenitors differentiate into  
84 post-mitotic neurons, the expression of EZH2 is downregulated, but still maintained. Conditionally  
85 knocking out *Ezh2* in neural progenitors has been shown to regulate directional neuronal migration in  
86 the brain stem (Di Meglio et al., 2013). Similarly, knocking down EZH2 in radial glia cells led to impaired  
87 cortical neuronal migration (Zhao et al., 2015). Very interestingly, a recent study showed that activating  
88 endogenous EZH2 in embryonic stem cells using CRISPRa approach promoted neuronal differentiation,  
89 likely by suppressing the expression of endodermal and mesodermal specific gene transcription (Liu et al.,  
90 2018). Moreover, when combined with other transcription factors, such as POU3F2 and Neurogenin 1,  
91 EZH2 expression could induce direct reprogramming of fibroblasts to neurons. In sum, these studies

92 highlighted the important roles of EZH2 in stem cells to control neuronal differentiation. However, the  
93 roles of EZH2 in post-mitotic neurons remain elusive.

94 As mentioned above, EZH2 in neural progenitors and in post-mitotic neurons may regulate  
95 different sets of genes and have distinct neuronal phenotypes. More importantly, to date the specific *in*  
96 *vivo* roles of EZH2 in early post-mitotic neurons during development remain largely unknown. To directly  
97 address the *in vivo* roles of EZH2 specifically in excitatory post-mitotic neurons, we generated neuron-  
98 specific *Ezh2* conditional knockout mice using *Neurod6-Cre* mice, in which Cre recombinase is expressed  
99 specifically in early post-mitotic excitatory neurons of the developing brain. We found that deletion of  
100 neuronal EZH2 delayed but not persistently blocked neuronal migration. More interestingly, EZH2 null  
101 neurons displayed more complex dendritic arborization and increased dendritic spine density, indicating  
102 that EZH2 acts to suppress dendritic development. RNA-Seq experiments comparing control and EZH2  
103 null neurons identified genes regulated by EZH2, among which *Pak3* was selected for further study. The  
104 results showed that PAK3 expression was suppressed by EZH2 through H3K27me3. Functionally,  
105 expression of a dominant negative PAK3 reversed the increased dendritic spine density in EZH2 null  
106 neurons. Lastly, we provided evidence that adult mice lacking neuronal EZH2 had reduced working and  
107 recognition memory. Together, our study revealed an important role of neuronal EZH2 in regulating  
108 multiple steps of neuronal morphogenesis, which affected cognitive function in adult mice.

109

110

111

112

113

114

## 115 **Results**

### 116 **Conditional deletion of EZH2 in post-mitotic pyramidal neurons during development**

117 To study the roles of EZH2 in post-mitotic neurons, we first performed immunostaining to examine  
118 the presence of EZH2 and H3K27me3. The results showed that EZH2 and SUZ12, two major components  
119 of the PRC2 complex, and H3K27me3 were all clearly presented in the nuclei of post-mitotic cortical  
120 neurons (Supplementary Fig. S1a). To delete EZH2 specifically in post-mitotic neurons, we generated  
121 neuronal specific conditional EZH2 knockout mice by breeding *Ezh2* floxed mice (*Ezh2<sup>fl/fl</sup>*) with *Neurod6-*  
122 *Cre* mice, which express the Cre recombinase mainly in early developing post-mitotic neurons and some  
123 in intermediate progenitors (Goebbels et al., 2006). Previous studies (Goebbels et al., 2006; Wu et al.,  
124 2005) using Cre reporter mice showed that *Neurod6-Cre*-mediated recombination occurs in almost all  
125 excitatory pyramidal neurons in the dorsal telencephalon starting at about embryonic day 11 (E11). Thus,  
126 several recent studies used this mouse line to study gene functions specifically in post-mitotic neurons  
127 during development (Hirayama et al., 2012; Kazdoba et al., 2012; Morgan-Smith et al., 2014; Schwab et  
128 al., 2000). In support, immunostaining of CRE in postnatal day 0 (P0) *Neurod6-Cre* mouse brain sections  
129 showed wide spread CRE expression in cortex and hippocampus (Supplementary Fig. S1b).

130 Although both *Ezh2* and *Neurod6* are located in the chromosome 6, we were able to obtain a few  
131 *Neurod6-Cre/Ezh2<sup>fl/+</sup>* mice, which were then bred with *Ezh2<sup>fl/fl</sup>* mice to obtain the conditional neuronal  
132 EZH2 knockout mice, *Neurod6-Cre/Ezh2<sup>fl/fl</sup>* mice (named *Ezh2<sup>Δ/Δ</sup>* mice hereafter). The CRE-mediated  
133 recombination was first verified by RT-PCR showing a CRE-generated band at 254 bp (Supplementary  
134 Fig. S1c), the same as shown in a previous study in which *Ezh2* was knocked out in B cells using the same  
135 *Ezh2<sup>fl/fl</sup>* mice (Su et al., 2003). To directly show that EZH2 was deleted in post-mitotic neurons, we  
136 examined the EZH2 level in cultured E18 hippocampal neurons from control or *Ezh2<sup>Δ/Δ</sup>* mice by  
137 immunostaining. EZH2 was clearly localized in wildtype neurons from the control mice, whereas it was

138 drastically decreased in *Cre*-positive neurons from *Ezh2<sup>ΔΔ</sup>* mice (Fig. 1a, b). We next examined the  
139 fluorescence intensity of H3K27me3 immunostaining in cultured hippocampal neurons from *Ezh2<sup>ΔΔ</sup>* mice.  
140 The results showed that the levels of H3K27me3 were significantly decreased in cultured *Cre*-positive  
141 cells from *Ezh2<sup>ΔΔ</sup>* mice (Fig. 1c, d). We also examined the H3K27me3 levels in cortical slices and  
142 observed a similar significant reduction in *Cre*-positive cortical neurons from *Ezh2<sup>ΔΔ</sup>* mice *in vivo* (Fig.  
143 1e, f). The expression levels of EZH2 and H3K27me3 in *Ezh2<sup>ΔΔ</sup>* mice were also evaluated by western  
144 blot. The western blot of postnatal day 0 (P0) mouse cortical lysate showed that EZH2 level in *Ezh2<sup>ΔΔ</sup>*  
145 mice was dramatically decreased compared to the *Cre*-negative control littermate mice (*Ezh2<sup>fl/fl</sup>*) (Fig. 1g).  
146 The remaining EZH2 was most likely from interneurons or developing glial cells that were *Cre*-negative  
147 cells. Because some studies have shown that EZH1, the paralog of EZH2, had similar methyltransferase  
148 activity (Henriquez et al., 2013), the remaining H3K27me3 in *Ezh2<sup>ΔΔ</sup>* neurons could also be due to the  
149 effect of EZH1. Taken together, the results demonstrated clearly that EZH2 was successfully deleted in  
150 developing cortical and hippocampal neurons of *Ezh2<sup>ΔΔ</sup>* mice, and deleting EZH2 alone was sufficient to  
151 significantly reduce the H3K27me3 levels in neurons in the presence of EZH1. *Ezh2<sup>ΔΔ</sup>* mice thus provide  
152 us a useful model to study the specific function of EZH2 and H3K27me3 in post-mitotic neurons.

153

#### 154 **Neuronal EZH2 regulates migration of post-mitotic cortical neurons *in vivo***

155 To explore neuronal functions of EZH2 during neural development, we analyzed the structure of  
156 mouse cortex in both *Ezh2<sup>ΔΔ</sup>* mice and their littermate *Ezh2<sup>fl/fl</sup>* control mice at different developmental  
157 stages. The structure of forebrain was analyzed by Nissl staining at P0, and no significant difference in  
158 brain structure was observed in *Ezh2<sup>ΔΔ</sup>* mutant mice (Supplementary Fig. S2a). Because *Neurod6*-*Cre* is  
159 mainly expressed in post-mitotic neurons (Goebbels et al., 2006) and a small percentage of it has been  
160 identified in intermediate progenitors of the dorsal telencephalon (Wu et al., 2005), during early neuronal

161 morphogenesis processes, such as neuronal migration, Cre is likely efficiently expressed in later born  
162 upper cortical layer neurons at that particular time point. Indeed, when the cortical lamination was assessed  
163 at E15, a time point of generation of earlier born deep layer cortical neurons, the Tbr1 positive deep layer  
164 neurons appeared to be similar between the control and the *Ezh2<sup>ΔΔ</sup>* mice (Supplementary Fig. S2b). The  
165 potential reason is that EZH2 protein might not been fully deleted in these early born deep layer post-  
166 mitotic neurons. To investigate the effects of neuronal EZH2 on the development of upper layer cortical  
167 neurons, the mouse cortex was analyzed at P0 by Foxp1 and Ctip2 staining, which labeled layers II-IV  
168 and V-VI, respectively (Molyneaux et al., 2007). The distributions of labeled cells within 6 bins assigned  
169 across the apicobasal axis were quantified. We noted a milder but significant reduction of Foxp1  
170 expressing neurons in *Ezh2<sup>ΔΔ</sup>* mice at the upper position (Bin 5) compared with the control mice (Fig. 2a,  
171 b), whereas the total number of Foxp1 positive neurons was not significantly changed. In addition, the  
172 distributions of Ctip2 positive neurons were also significantly different between the *Ezh2<sup>ΔΔ</sup>* and the  
173 control mice (Fig. 2a, c). The Ctip2 positive neurons in *Ezh2<sup>ΔΔ</sup>* mice were at a higher density in Bin 3  
174 than those in wild type mice (Fig. 2c). Together, these results suggested that deletion of neuronal EZH2  
175 by *Neurod6-Cre* significantly reduced the migration of upper cortical neurons.

176 To verify if EZH2 regulates the migration of post-mitotic neurons in a cell autonomous manner  
177 and to visualize the morphologies of migrating neurons, we performed acute EZH2 deletion by in utero  
178 electroporation of *Neurod1-Cre* plasmid into E15 embryonic brains of *Ezh2<sup>fl/fl</sup>* mice. The pCAG-dsRed  
179 plasmid was co-electroporated with *Neurod1-Cre* to label the transfected cells. The *Ezh2<sup>fl/fl</sup>* embryos in the  
180 control group were only electroporated with the pCAG-dsRed plasmid. When the distribution of dsRed  
181 positive cells was analyzed at P0, we found that acutely knocking out EZH2 in post-mitotic neurons  
182 significantly impaired neuronal migration (Fig. 2d). In contrast, the majority of neurons in the control  
183 mice migrated into the upper cortical plate (Fig. 2d). Quantification revealed that deletion of EZH2 in



184 post-mitotic neurons led to the migration defects of upper layer neurons at P0 (Fig. 2d, e). Neurons  
185 transition from a multipolar to a unipolar/bipolar morphology to initiate radial migration (Rakic, 1972).  
186 When neuronal morphology was examined, both control and *Ezh2<sup>ΔΔ</sup>* neurons showed similar polarized  
187 shape with a leading process directed toward the pial surface (Fig. 2f). When embryos were in utero  
188 electroporated at E15 and analyzed at P7, both control and *Ezh2<sup>ΔΔ</sup>* neurons (dsRed positive) reached the  
189 upper layer similarly (Supplementary Fig. S3). Thus, specific neuronal deletion of EZH2 only delayed but  
190 not persistently impaired the migration of cortical pyramidal neurons.

191

### 192 **Loss of neuronal EZH2 results in increased dendritic complexity *in vitro* and *in vivo***

193 To investigate the role of EZH2 in regulating neuronal morphogenesis, we isolated and cultured  
194 E18 hippocampal neurons from both control and *Ezh2<sup>ΔΔ</sup>* mice. At DIV5, the neurons were fixed and  
195 stained with both anti-Cre and anti-MAP2 antibodies. To quantify dendritic morphology, we first  
196 evaluated dendritic branching using the Sholl analysis, which measures the number of intersections of  
197 dendrites within each sphere plotted against radius increasing in 10 $\mu$ m increments of cell soma. Compared  
198 with control neurons, *Ezh2<sup>ΔΔ</sup>* neurons showed more complex dendritic morphology (Fig. 3a, b). The Sholl  
199 analysis of dendritic arborization revealed markedly increased dendritic branching in *Ezh2<sup>ΔΔ</sup>* neurons  
200 compared to those of control neurons (Fig. 3c). Further, morphological analysis revealed that the *Ezh2<sup>ΔΔ</sup>*  
201 neurons displayed significantly increased total dendritic branch length (TDBL) (Fig. 3d) and total  
202 dendritic branch tip number (TDBTN) (Fig. 3e). The average dendritic branch length (ADBL) was  
203 significantly reduced (Fig. 3f), primarily due to the increased proportion of short branches. These results  
204 indicated that *Ezh2<sup>ΔΔ</sup>* hippocampal pyramidal neurons increased their dendritic growth and arborization  
205 by promoting the formation of short dendritic branches.

206 To verify if the dendritic morphology was altered in *Ezh2<sup>ΔΔ</sup>* mice *in vivo*, we generated  
207 *Ezh2<sup>ΔΔ</sup>;Thy1-GFP-M* mice, in which pyramidal neurons in adult mouse cortex and hippocampus were  
208 labeled by Thy1-GFP. The control mice were *Ezh2<sup>fl/fl</sup>;Thy1-GFP-M* littermate mice. Because GFP labeled  
209 neurons in the hippocampus were at a higher density, making it difficult to quantify the dendritic tree  
210 clearly. We thus prepared the coronal brain sections of these mice at P28-30 and imaged the GFP-labeled  
211 layer IV-V neurons that were more sparsely labeled (Fig. 4a). Similar to cultured hippocampal neurons,  
212 *Ezh2<sup>ΔΔ</sup>* neurons exhibited more complex dendritic morphologies (Fig. 4b, c). Indeed, Sholl analyses  
213 revealed that *Ezh2<sup>ΔΔ</sup>* cortical neurons had more complex basal, but not apical, dendritic morphologies  
214 (Fig. 4d-f). Additional quantification showed that the basal dendrites of *Ezh2<sup>ΔΔ</sup>* neurons had significantly  
215 increased TDBTN and reduced ADBL, indicating increased dendritic branching with shorter branch  
216 lengths (Fig. 4g, h). These results were the same as those observed in cultured hippocampal neurons.  
217 However, unlike that *in vitro* results, the TDBL between the *Ezh2<sup>ΔΔ</sup>* and control neurons were similar  
218 (Fig. 4i). Overall, these results provided strong evidence that neuronal EZH2 plays an important role in  
219 the regulation of dendritic development.

220

## 221 **Neuronal EZH2 regulates dendritic spine density and synaptic function**

222 Synaptic remodeling in the hippocampus is a key process for controlling working memory and  
223 novelty recognition (Bourne and Harris, 2007; Compte et al., 2000). Therefore, we examined dendritic  
224 spine development in hippocampal and cortical pyramidal neurons of young adult control or *Ezh2<sup>ΔΔ</sup>* mice.  
225 We first examined P28-30 pyramidal neurons in the hippocampal CA1 region, the spine density of the  
226 basal dendrites was significantly increased (Fig. 5a and 5b). Dendritic spines often show a myriad of  
227 morphologies, which usually correlate with different synaptic properties. For instance, large mushroom  
228 like spines usually form strong and persistent connections, whereas thin spines are more dynamic and

229 have weaker connections. To better understand how EZH2 regulates dendritic spine development, we  
230 categorized the spine morphologies into 4 different groups, stubby spine, filopodia like spines, mushroom  
231 spine, and long thin spine (Fig. 5c). Analysis of spine morphologies on apical dendrites of CA1 neurons  
232 revealed that *Ezh2<sup>Δ/Δ</sup>* neurons had decreased percentage of mushroom spines and increased percentage of  
233 filopodia like spines (Fig. 5d). To investigate the functional consequences of increased dendritic spine  
234 density in *Ezh2<sup>Δ/Δ</sup>* mice, we performed whole cell patch-clamp recordings of cultured hippocampal  
235 neurons *in vitro*. mEPSC analysis revealed a reduction in mEPSC frequency in *Ezh2<sup>Δ/Δ</sup>* neurons (Fig. 5e).  
236 However, no significant change was detected in the mEPSC amplitude. Change in mEPSC amplitude are  
237 consistent with the density/conductance of postsynaptic receptors at individual synapses. Change in  
238 mEPSC frequency is usually interpreted as change in either the presynaptic release probability at existing  
239 sites or in the number of functional synaptic sites. Here, since *Ezh2<sup>Δ/Δ</sup>* neurons exhibited more synapses,  
240 the reduction in mEPSC frequency in *Ezh2<sup>Δ/Δ</sup>* mutant neurons is most likely due to the silencing of  
241 excitatory synapses.

242 We next examined the dendritic spine density in layer IV-V cortical neurons from P28-30  
243 *Ezh2<sup>Δ/Δ</sup>;Thy1-GFP-M* mice or *Ezh2<sup>ff</sup>;Thy1-GFP-M* littermate mice. The spine density of basal dendrites  
244 was similarly increased in *Ezh2<sup>Δ/Δ</sup>* mice (Supplementary Fig. S4a, b). We also performed Golgi staining  
245 in brain sections of P28-30 control or *Ezh2<sup>Δ/Δ</sup>* mice. We found that the dendritic spine density of *Ezh2<sup>Δ/Δ</sup>*  
246 cortical neurons was significantly increased as well compared with that of the control neurons  
247 (Supplementary Fig. S4c, d). These results indicated that EZH2 restricted dendritic spine formation, and  
248 deleting EZH2 leads to increased dendritic spine density with less mature spines.

249

250 **Transcriptome analysis of genes regulated by neuronal EZH2**

251 To gain further insight into how EZH2 regulates gene expression in post-mitotic neurons, we  
252 examined the transcriptome between the control and *Ezh2<sup>ΔΔ</sup>* neurons. In addition to *Ezh2<sup>ΔΔ</sup>* mice, we also  
253 generated *Nestin-Cre/Ezh2<sup>ff</sup>* mice, in which *Ezh2* was knocked out in neural progenitors. Hippocampal  
254 neurons from E18 *Ezh2<sup>ff</sup>*, *Ezh2<sup>ΔΔ</sup>* or *Nestin-Cre/Ezh2<sup>ff</sup>* embryos were dissociated and cultured in a  
255 neuronal culture condition for 3 days. The neurons were collected to extract total RNAs, which were used  
256 for RNA-seq to identify differently expressed genes (DEGs) between control and *Ezh2* knockout neurons  
257 (Fig. 6a). Our analysis revealed 1880 and 1783 up and down regulated genes, respectively, in the *Ezh2<sup>ΔΔ</sup>*  
258 neuronal samples compared with the control sample (fold>2). For the sample from the *Nestin-Cre/Ezh2<sup>ff</sup>*  
259 neurons, there were 2061 and 3044 up and down regulated genes, respectively (Fig. 6b, Data set 1). The  
260 DEGs identified through *Ezh2<sup>ΔΔ</sup>* mice and *Nestin-Cre/Ezh2<sup>ff</sup>* mice partially overlap. Although the RNA-  
261 seq experiments were both performed using post-mitotic neurons, this result suggested that knocking out  
262 *Ezh2* in neural progenitors or post-mitotic neurons resulted in different changes of gene transcription in  
263 neurons. To better understand the potential functions of these DEGs regulated by EZH2, we performed  
264 gene ontology (GO) analysis of biological processes. The results showed that many DEGs induced by  
265 deleting neuronal EZH2 were related to biological processes involved in neural development, such as  
266 neuron migration, positive regulation of cell migration, neuron projection morphogenesis, regulation of  
267 neuron differentiation, synapse organization, and dendrite development, etc. (Fig. 6b). We also performed  
268 network analyses of subgroups of enriched GO terms. The relationships among different GO terms were  
269 plotted and visualized using the Metascape (<http://metascape.org>) and Cytoscape5 (Supplementary Fig.  
270 S5a-d). Moreover, by comparing DEGs induced by EZH2 knockout with the SFARI AutDB gene database  
271 (<https://gene.sfari.org>), we found that many DEGs overlapped with ASD risk genes (Fig. 6c). This result  
272 is consistent with recent studies, in which EZH2 was identified to be involved in genetic etiology of autism

273 (Li et al., 2016) or an important downstream target of CHD8, a major ASD-associated gene (Durak et al.,  
274 2016).

275 Lastly, using quantitative real time PCR (qPCR), we next examined a subset of genes that have  
276 been shown to be involved in regulation of dendritic development or synaptic function. Several of these  
277 genes showed significant up regulation in *Ezh2<sup>Δ/Δ</sup>* neurons, including *Pak3* and *Bdnf* (Fig. 6d). Together,  
278 these data suggest that neuronal EZH2 plays important roles in the regulation of gene transcriptions related  
279 to neural development.

280

### 281 **PAK3 acts downstream of EZH2 and H3K27me3 to regulate dendritic spine development**

282 To provide evidence that neuronal EZH2 regulates dendritic development through its downstream  
283 targeted genes, we selected PAK3 that was well-known to regulate dendritic synaptogenesis (Boda et al.,  
284 2008; Node-Langlois et al., 2006). In cultured hippocampal neurons, the protein levels of EZH2 decreased  
285 in time, whereas the levels of PAK3 increased (Fig. 7a). The result was consistent with the role of EZH2  
286 in the regulation of H3K27me3, which functioned to repress gene expression. In supporting the qPCR  
287 result, western blot analysis showed that the protein levels of PAK3 were significantly increased in *Ezh2<sup>Δ/Δ</sup>*  
288 neurons (Fig. 7b). We performed ChIP to determine if H3K27me3 directly interacts with the promoter  
289 region of *Pak3*. The genomic region of *Pak3* was defined into 3 overlapping fragments (R1-3, Fig. 7c),  
290 and specific primers were designed to amplify these 3 regions of *Pak3* promoter. The result showed that  
291 H3K27me3 specifically interacted with the R3 region (from 2 kb to 1 kb upstream) but not the R1/2  
292 regions in P7 mouse cortical tissues (Fig. 7d). In contrast, immunoprecipitation with IgG did not display  
293 any interactions with R1-3 regions. The qRT-PCR data showed that the binding of H3K27me3 with the  
294 R3 region was significantly higher than that with IgG in mouse cortical tissue (Fig. 7e). These results

295 indicated that EZH2 repressed *Pak3* expression through H3K27me3, which directly binds to the regulatory  
296 sequence upstream of *Pak3*.

297 To determine if PAK3 is indeed functionally involved in spine development downstream of EZH2,  
298 we tested if a dominant negative PAK3 plasmid, PAK3<sup>K297R</sup> (Zhang et al., 2005), could revert the increased  
299 spine density observed in *Ezh2<sup>Δ/Δ</sup>* neurons. E18 hippocampal neurons from the control or *Ezh2<sup>Δ/Δ</sup>* mice  
300 were cultured. At DIV 7, the control neurons were transfected with dsRed and the *Ezh2<sup>Δ/Δ</sup>* neurons were  
301 transfected with either dsRed or dsRed+PAK3<sup>K297R</sup>. At DIV18, the neurons were fixed and the dendritic  
302 spine densities were quantified. The results showed that the increased spine density in *EZH2<sup>Δ/Δ</sup>* neurons  
303 was reverted by *Pak3<sup>K297R</sup>* to the same level as that of the control neurons (Fig. 7f, g). Altogether, these  
304 results provided strong evidence that EZH2 repressed the expression of PAK3, which regulated the spine  
305 density in hippocampal neurons.

306

### 307 **Neuronal EZH2 ablation during development has prolonged effects on impairing cognitive** 308 **behaviors in adult mice**

309 To investigate the potential effects of neuronal EZH2 ablation on cognitive function of adult mice,  
310 we performed a battery of behavioral tests using *Ezh2<sup>Δ/Δ</sup>* and control (*Ezh2<sup>fl/fl</sup>*) littermate male and female  
311 mice. Spatial working memory and spatial recognition memory was evaluated using Y maze assay as  
312 previously described (Fig. 8a) (Ayhan, 2011; Abazyan, 2010; Dellu et al., 2000). To test for working  
313 memory, the spontaneous alternations test was performed. We found that *Ezh2<sup>Δ/Δ</sup>* mutant mice showed a  
314 significant reduction in the percentage of correct alterations compared to control mice (Fig. 8b). Mice  
315 were also tested in the Y-maze for recognition memory (Fig. 8c). We found that *Ezh2<sup>Δ/Δ</sup>* mice showed  
316 shorter spending time in the novel arm (the arm that was first blocked) (Fig. 8c). These results indicate  
317 that *Ezh2<sup>Δ/Δ</sup>* mice had reduced spatial working and recognition memories. We next performed the novel

318 object recognition test (Fig. 8a, d). The results showed that *Ezh2<sup>Δ/Δ</sup>* mutant mice spent significantly less  
319 time sniffing the novel object (Fig. 8d), indicating that novel object recognition memory was also impaired  
320 in the *EZH2<sup>Δ/Δ</sup>* mutant mice.

321 Using a different group of mice, we performed similar spatial working and recognition memory  
322 tests by separately analyzing the results from male or female mice. We found that both male and female  
323 *Ezh2<sup>Δ/Δ</sup>* mice had significantly impaired spatial working and recognition memories (Fig. 8e, f). These  
324 cognitive deficits could not be explained by changes in anxiety or general activity as we observed no  
325 group-differences in elevated plus maze test (Supplementary Fig. S6a, b) or in open field test  
326 (Supplementary Fig. S6c-e).

327 Collectively, these results illustrated that working and recognition memory was significantly  
328 impaired in the *Ezh2<sup>Δ/Δ</sup>* mice, suggesting that neuronal EZH2 might be involved in neuronal development  
329 processes contributing to memory related cognitive functions in adult mice.

330

331 **Discussion**

332           The major function of EZH2 is to trimethylate H3K27 and repress gene expression, which has  
333 been mostly studied in dividing cells, such as stem cells and cancer cells. During different stages of cell  
334 development, including the maintenance of the stem cell states and distinct cell fate differentiation, EZH2-  
335 mediated H3K27me3 acts to repress distinct gene sets in different cell types to maintain their specific  
336 identities. For instance, in stem cells H3K27me3 functions to maintain the stemness by repressing genes  
337 that induce cell differentiation. However, after stem cells differentiate into specific cell types, H3K27me3  
338 instead regulates genes related to cell differentiation and maturation. Disruption of such function often  
339 leads to failed cell differentiation and tumorigenesis (Min et al., 2010). In the nervous system, knocking  
340 out *Ezh2* in neural progenitors suppresses proper progenitor cell proliferation and promotes early neuronal  
341 differentiation (Pereira et al., 2010). Lacking of EZH2 in neural progenitors also resulted in neuronal  
342 migration defects (Zhao et al., 2015). However, whether specific deletion of EZH2 in post-mitotic neurons  
343 has any effects on neural development is currently unknown, which might have distinct phenotypes from  
344 deleting EZH2 in neural stem cells. For instance, conditionally knocking out LKB1 in neural progenitors  
345 using *Emx1-Cre* led to defects in axon formation (Barnes et al., 2007), whereas knocking out LKB1 in  
346 post-mitotic neurons using *Neurod6-Cre* had no effect on axon formation but resulted in axon branching  
347 defects (Courchet et al., 2013). In this study, we used *Neurod6-Cre* mouse line to generate conditional  
348 *Ezh2* knockout mice specifically in post-mitotic neurons. Our results showed that neuronal EZH2  
349 functioned to regulate multiple neuronal morphogenesis processes *in vivo* during development and  
350 resulted in impaired cognitive function in adult mice.

351           In mature neurons, a recent study showed that EZH1/EZH2 and H3K27me3 function to protect  
352 neurons from degeneration (von Schimmelmann et al., 2016). Our recent study showed that EZH2 and  
353 H3K27me3 acted to support axon regeneration (unpublished). Two previous studies have observed



354 impaired neuronal migration when EZH2 was knocked out (Di Meglio et al., 2013) or knocked down  
355 (Zhao et al., 2015) in neural progenitors. To date, however, no study has investigated the specific *in vivo*  
356 roles of neuronal EZH2 in neural development. Our results demonstrated that in *Ezh2<sup>ΔΔ</sup>* mice there was  
357 impaired migration of upper layer cortical neurons at P0. In support, *in utero* electroporation of *Neurod1-*  
358 *Cre* plasmid into *Ezh2<sup>f/f</sup>* mouse embryos also led to drastically decreased cortical neuron migration when  
359 examined at P0. Such neuronal migration defect was only temporary because when examined at P7,  
360 cortical neurons lacking neuronal EZH2 caught up with wild type neurons to reach the upper cortical  
361 layers. One potential mechanism is that neuronal EZH2 in early post-mitotic neurons regulates genes  
362 important for fast neuronal migration, whereas, in more mature neurons, EZH2 level decreases and plays  
363 less important roles in neuronal migration.

364 Our study demonstrated that deleting neuronal EZH2 resulted in more complex dendritic  
365 arborization and higher dendritic spine density *in vivo*, indicating that it acts to maintain proper dendritic  
366 arborization and dendritic spine formation during development. In contrast, our recent study showed that  
367 EZH2 was necessary for axon growth during development and regeneration (unpublished). These results  
368 suggest that during neuronal morphogenesis EZH2 functions to support axon growth and in the meantime  
369 suppress excessive dendritic development. It is likely that EZH2 regulates neuronal morphogenesis via  
370 H3K27me3-mediated gene repression. Many genes have been identified to regulate dendritic development,  
371 such as growth factors, small Rho GTPases, and cytoskeletal proteins (Brion et al., 1988; Kosik and Finch,  
372 1987; Van Aelst and Cline, 2004). How expression of these genes is coordinated is unclear. Our study  
373 provides a potential mechanism that EZH2 coordinately regulates genes related to dendritic development.  
374 Indeed, RNA-seq comparing neurons from the control and *Ezh2<sup>ΔΔ</sup>* mice has revealed many genes  
375 regulated by neuronal EZH2, including *Pak3*, *Igf*, and *Bdnf*, all of which have been shown to regulate  
376 dendritic development (Dai et al., 2014; Dijkhuizen and Ghosh, 2005; Gorski et al., 2003; Pascual-Lucas

377 et al., 2014; Schmeisser et al., 2012). We provided evidence that *Pak3* expression was repressed by EZH2-  
378 mediated H3K27me3 and blocking PAK3 function reversed increased dendritic spine density induced by  
379 EZH2 deletion. Future in depth studies of genes regulated by neuronal EZH2 will help to identify novel  
380 genes and pathways regulating *in vivo* dendritic development, providing new insights into the underlying  
381 genetic mechanisms. In this study, we also used RNA-seq to compare gene expression in post-mitotic  
382 neurons from wild type and *Nestin-Cre;Ezh2<sup>fl/fl</sup>* mice, in which *Ezh2* was knocked out in neural progenitors.  
383 The identified genes partially overlap with those obtained using neurons from the *Ezh2<sup>ΔΔ</sup>* mice, indicating  
384 that EZH2 at different developmental stage might regulate different sets of gene expression. In support, a  
385 recent study (Durak et al., 2016) has shown that *Ezh2* expression is positively regulated by *Chd8*, a top  
386 ASD linked gene, in neural progenitors. In that study, knocking down *Chd8* resulted in down regulation  
387 of EZH2. However, upper layer cortical neurons with reduced CHD8 and EZH2 proteins show decreased  
388 complexity of dendritic arborization, which is opposite to our results. Of course, we cannot rule out the  
389 possibility that CHD8 plays an important role in the regulation of dendritic development independent of  
390 EZH2.

391 Dendritic arborization and dendritic spine formation are essential processes in the formation of  
392 functional circuits regulating cognitive function. In humans, mutations in *Ezh2* gene underlie the Weaver  
393 Syndrome, a genetic disease associated with intellectual disability. Both *Ezh2* and *Jmjd3* have been  
394 identified as ASD associated genes (Iossifov et al., 2012; Li et al., 2016), and *Ezh2* is a downstream target  
395 gene of *Chd8* (Durak et al., 2016). Our study revealed that specific deleting *Ezh2* in early post-mitotic  
396 neurons resulted in impaired learning and memory defects in adult mice. It is likely that changes in  
397 neuronal morphogenesis processes, especially the dendritic development, induced by neuronal *Ezh2*  
398 deletion might underlie some of the cognitive behavior phenotypes observed in patients with Weaver  
399 Syndrome or ASD. Additional more targeted cognitive behavior tests are needed in the future to further

400 assess the roles of neuronal EZH2 in cognitive function. Previous studies have shown the roles of other  
401 epigenetic regulators in regulating dendritic development and cognitive function, such as histone  
402 deacetylase 2 (HDAC2) (Guan et al., 2009). Conversely, behavior training for learning and memory in  
403 adult mice also changes the histone modifications. For example, contextual fear conditioning increased  
404 levels of acetylation at H3 lysine 14 (H3K14), phosphorylation at H3 serine 10 (H3S10), and  
405 trimethylation at H3 lysine 4 (H3K4me3) in the hippocampus (Levenson et al. 2004; Chwang et al. 2006).  
406 Behavior training on the Morris water maze increased the acetylation at H4 lysine 12 (H4K12) and pan-  
407 acetylation of H2B (Bousiges et al. 2010). Collectively, our study provides clear and strong evidence that  
408 histone modification by EZH2 in post-mitotic neurons plays important roles in the regulation of neural  
409 developmental with cognitive consequences in adult mice.

410

411

412

## 413 **Methods and materials**

### 414 **Animals**

415 All experiments involving animals were performed in accordance with the animal protocol approved by  
416 the Institutional Animal Care and Use Committee of the Johns Hopkins University. The Neurod6-Cre  
417 (Nex-Cre) were generously provided by William D. Snider (Goebbels et al., 2006; Morgan-Smith et al.,  
418 2014). *Ezh2<sup>ff</sup>* (MMRRC\_015499-UNC) mice were purchased from Mutant Mouse Resource Research  
419 Centers (MMRRC). *Ezh2<sup>ff</sup>* mice have been previous described (Pereira et al., 2010; Su et al., 2003) .  
420 The Thy1-GFP M mice were generously provided by Richard Haganir (Duan et al., 2014) . The mice  
421 have been previous described. The day of vaginal plug detection was designated as E0.5 and the day of  
422 birth as P0.

423

### 424 **DNA constructs and antibodies**

425 Plasimds pCAG-dsRed was bought from addgene (Plasmid #11151). *Neurod1-Cre* was provided  
426 by Dr Franck Polleux (Columbia University). *Pak3<sup>K297R</sup>* was gifted from Dr. Rick Horwitz (University of  
427 Virginia). PAK3 mutant was subcloned into pCMVmyc vector.

428 The following primary antibodies were used in this study: anti-EZH2 1:500 (BD biosciences,  
429 Cat.no. 612666), anti-EZH2 1:1000 (Cell signaling, Cat.no. #5246), anti-GAPDH 1:5000 (Sigma,  
430 Cat.no. G8795), anti-GFP 1:1200 (Thermo Fisher scientific, Cat.no. A10262), anti-TUJ1 1:1000  
431 (Biolegend, Cat.no. 801201) anti-H3K27me3 1:2000 (Millipore, Cat.no. 07449), anti-H3 1:1000 (Cell  
432 signaling, Cat.no. #4499), anti-dsRED 1:1000 (Clontech, Cat.no. 632496), anti-Tbr1 1:1000 (Abcam,  
433 Cat.no. ab31940), anti-Ctip2 1:500 (Abcam, Cat.no. ab18465), anti-Foxp1 1:1000 (Abcam,  
434 Cat.no. ab16645), anti-Cre 1:1000 (Millipore, Cat.no. MAB3120).

435

## 436 **Primary neuronal cultures and treatment**

437 All hippocampi and cortices were dissected in ice cold  $\text{Ca}^{2+}$ - and  $\text{Mg}^{2+}$ -free Hank's balanced salt  
438 solution (HBSS; Gibco) and incubated in Papain at 37 °C for 15 min. Dissociated cells were plated on  
439 poly-D-lysine (Sigma)- coated 12mm coverslips. Cells were cultured in Neurobasal medium (Gibco)  
440 containing 2% B27 supplement (Gibco) and 50 U ml<sup>-1</sup> penicillin, 50 µg/ml streptomycin (Gibco), 2 mM  
441 GlutaMAX (Gibco), and grown for 5 days, or 18 days with media changes every other day on glass  
442 coverslips. Plasmids pCAG-dsRed and *Pak3*<sup>K297R</sup> transfection was performed at 7 d in vitro (DIV) with 1  
443 µg of DNA and 1.5 µl of Lipofectamine (Invitrogen), as described in manufacturer's manual (Invitrogen).  
444 After transfection, the culture medium was switched to the neuronal culture medium plus 2% FBS  
445 (Invitrogen) with medium changes every other day. Neurons were fixed in 4% paraformaldehyde for  
446 20 min, and processed for immunocytochemistry.

447

## 448 **Golgi Staining**

449 Freshly dissected mouse brains were incubated in Golgi solution A and B (FD Rapid GolgiStain  
450 Kit, FD NeuroTechnologies) for 10 days. After incubation all brains were washed thoroughly with  
451 Solution C for 72 h at room temperature, and then mouse brains were blocked and embedded in OCT  
452 embedding medium (Tissue-Tek). Coronal sections (100 µm) through the somatosensory cortex and  
453 medial CA1 were cut with a Microm HM 550 cryostat and mounted on 3% gelatin-coated slides. Staining  
454 procedures were followed as described (FD NeuroTechnologies), and slides were dehydrated in ethanol  
455 and mounted with Permount (Fisher Scientific) for microscopy. Layer II–III neurons from the  
456 somatosensory cortex were included in our analyses.

## 457 **Immunohistochemistry and fluorescence intensity quantification**

458 Immunohistochemistry of cultured neurons and brains were performed and quantified using  
459 standard methods. In brief, the cultured cells were washed with PBS (Invitrogen), and then fixed in 4%  
460 PFA. Neurons were blocked in 1% BSA (in 0.2% PBST), incubated with primary antibodies overnight at  
461 4°C, and visualized with secondary antibodies.

462 Perfused brains were processed and sections were stained as described (Cubelos et al., 2008).  
463 Brains were gained and post-fixed in 4% PFA for 24 h at 4°C, and then followed by 15%, 30% (w/v)  
464 sucrose in PBS at 4°C until brains sunk. Brains were sectioned in from 40 to 50µm. Sections were  
465 incubated with primary antibodies overnight at 4°C, and incubated with secondary antibodies for 1h at  
466 room temperature.

467 All the images were taken by Zeiss 510 confocal microscopy. Fluorescence intensity were  
468 quantified by Image J software ((NIH, available from <http://rsb.info.nih.gov/ij>). First, the fluorescence  
469 intensity from each image stacks was subtracted by their background. Next, the average fluorescence per  
470 cell was calculated by measuring their average mean values.

471

#### 472 **Western blot analysis and quantification**

473 Tissue lysate were run on NuPAGE Novex 4-12% Bis-Tris Protein Gels (Thermo Fisher Scientific).  
474 Western blotting were performed as described (Saijilafu et al., 2013). Novex gels were run at 150 constant  
475 voltage to separate them, and transferred onto Immu-blot membranes (Bio-Rad) at a constant voltage (35V  
476 for 3hours). Membranes were blocked using 5% milk prepared in TBS-T (50 mm Tris-HCl (pH 7.4), 150  
477 mm NaCl, 0.1% Tween-20) for 1 h at room temperature. Membranes were incubated with the primary  
478 antibodies overnight at 4 °C. Secondary antibodies conjugated with horseradish peroxidase (Thermo  
479 Fisher Scientific) were incubated for 1 h at room temperature. Following washing with TBS-T,

480 immunoreactivity signals were detected by enhanced chemiluminescence (Perkin-Elmer). Western blot  
481 were quantified by Image J with standard method.

482

### 483 **Morphological Analysis**

484 All images were captured with a Zeiss 510 laser scanning confocal microscope. Dendritic  
485 processes, spine number, and spine morphology of individual neurons of the somatosensory cortex and  
486 hippocampus were measured with ImagJ or Imaris.

487 Dendrites arising from the cell body were considered as first-order segments until they bifurcated  
488 symmetrically into second-order segments; dendritic branches arising from the first-order segments were  
489 considered as second-order segments until they bifurcated symmetrically into third-order segments. The  
490 following parameters for each reconstructed cortical neuron were analyzed: (i) total dendritic branch  
491 length, representing the summed length of dendritic segments; (ii) total dendritic branch tip number  
492 (TDBTN), representing the total number of dendritic segments; (iii) average dendritic branch length,  
493 representing the individual dendritic branch length.

494 Spine density was calculated by quantifying the number of spines per measured length of the parent  
495 dendrite and expressed as the number of spines per 10- $\mu\text{m}$  length of dendrite. The length of each dendritic  
496 segment used for spine densitometry was around 20  $\mu\text{m}$ . For each neuron, spines in the second-order  
497 branches were quantified in P28-P30 mice All spine density quantification in *in vitro* culture was obtained  
498 from a 20  $\mu\text{m}$  dendrite segment at the second-order branches of neurons.

499

### 500 **Dendrite branching analysis and Sholl analysis**

501 All GFP-positive image stacks from transfected cortical neurons were taken as described. Dendrite  
502 branching was calculated manually by tracing dendrites of neurons. Sholl analysis was performed by

503 drawing concentric circles centered on the cell soma using ImageJ. The starting radius was 5  $\mu\text{m}$  and the  
504 interval between consecutive radii was 5  $\mu\text{m}$ .

505

## 506 **Behavioral studies**

507 All behavioral experiments were performed on 3-4 month old *Ezh2<sup>Δ/Δ</sup>* mice and their *Ezh2<sup>flx/flx</sup>*  
508 (control) littermates. Both male and female mice were included.

### 509 Y-Maze

510 The y-maze test was used to assess working memory and short-term spatial recognition memory in mice.  
511 To test for working memory, spontaneous alternations were assessed. Mice were placed at the end of one  
512 of the three arms of the maze (San Diego Instruments, San Diego, CA]) and allowed to explore the maze  
513 for 5 minutes. Videos were recorded and analyzed by Top Scan software (CleverSys Inc., Reston, VA).  
514 Spontaneous alternations were measured as percentage of correct sequences of successive, non-repeated  
515 visits to all three arms. 5 days later mice were tested again on the y-maze for recognition memory. For  
516 trial 1, one of the three arms was blocked and the animals were allowed to explore the other two arms for  
517 5 minutes. 12-15 minutes later, animals were returned to the maze with no arms blocked and allowed to  
518 explore for 5 minutes. Time spent in each arm was quantified, with more than 33% of time spent in the  
519 previously blocked arm was identified as recognition memory. Time spent in the blocked arm was  
520 compared between the experimental and control mice.

### 521 Elevated Plus Maze

522 To test anxiety of the mice, elevated plus maze (EPM) was performed. Mice were placed in the center of  
523 a t shaped maze (San Diego Instruments, San Diego, CA) that had two open arms and two arms enclosed  
524 by the walls. Mice were allowed to EPM sfor 5 minutes. Videos of the mice movements were recorded



525 and analyzed for % of time spent in the open and closed arms by Top Scan software (CleverSys Inc.,  
526 Reston, VA).

### 527 Novel Object Recognition

528 Object recognition memory was tested in the mice using novel object recognition test. For 3 days prior to  
529 testing, mice were allowed to habituate to custom made 25 cm x 25cm c 25cm acrylic boxes for 10 minutes.  
530 On the 4<sup>th</sup> day, two identical objects were placed in the center of the boxed equidistance from each other  
531 and the walls and mice were allowed to explore the objects for 10 minutes. One hour later, one of the two  
532 identical objects was replaced with a novel object. Mice were returned to the box and were allowed to  
533 explore the familiar and novel object. Time spent sniffing the familiar and novel object was automatically  
534 measured with the Top Scan software (CleverSys Inc., Reston, VA).

### 535 Open field test

536 General locomotor activity was evaluated in the activity chambers (SDI, San Diego, USA) for 30  
537 minutes. The time spent in the center and periphery of the arena as well as number of rears were  
538 automatically assessed.

539

### 540 **In utero electroporation**

541 All pregnant females were deeply anaesthetized with avertin via intraperitoneal injection. Plasmids  
542 were mixed with fast green and microinjected into the lateral ventricle of embryos using a picospritzer.  
543 Embryos were exposed at E15.5. Embryos were electroporated with five pulses of 35 V (50 ms on, 950  
544 ms off at 1 Hz) through 5-mm tweezer electrodes connected to a square wave electroporator  
545 (CUY21,  $\pi$  Protech).

546

### 547 **Chromatin immunoprecipitation (ChIP) assay**

548           ChIP assays were performed with a commercial kit (Chip-IT kit, Active motif). The cortices from  
549 P2 wildtype mice were minced and crosslinked in 1% formaldehyde (F8775, Sigma) for 15 min and the  
550 reaction was stopped by adding glycine (0.125 M). Nuclei of the cells were precipitated, lysated, and  
551 sonicated on ice 20 times for 5 s (duty cycle 40%, microtip limit 4) (Vibra-Cell V 50, Sonics Materials)  
552 (average fragment size of 400 bp). Part of supernatant was saved as input. The antibody used was a  
553 polyclonal anti-H3K27me3 (Millipore) and an unrelated rabbit IgG. Immunoprecipitates were mixed with  
554 protein G magnetic beads and incubated overnight at 4°C and washed, and protein/DNA complexes were  
555 eluted with cross-links reversed by incubating in ChIP elution buffer plus proteinase K for 2 h at 65°C.  
556 DNA was purified using spin columns and analyzed in duplicate by Q-PCR. Primer sequences for Q-PCR  
557 are described in Supplemental tables. Fold enrichment is expressed as the ratio of H3K27me3 signal to  
558 IgG signal.

559

#### 560 **Real-time PCR**

561           Total RNA from control and knockout mice was extracted using Trizol reagent (Invitrogen). RNA  
562 samples were treated with DNase I (Invitrogen) and reverse transcription was performed using transcriptor  
563 first strand cDNA synthesis kit (Roche). The LightCycler 480 SYBR Green I master mix (Roche) was used  
564 for real-time PCR. Threshold cycle (Ct) was determined on the linear phase. Relative gene expression fold  
565 difference was calculated by  $2^{-\Delta\text{normalized Ct}}$ . PCR primers are listed in Supplementary Table.

566

#### 567 **Electrophysiology**

568           Whole-cell electrophysiology and data analysis. Voltage-clamp wholecell recordings were  
569 obtained from cultured neurons at room temperature (22–25°C). An external solution containing 150 mM  
570 NaCl, 3 mM KCl, 10 mM HEPES, 6 mM mannitol, 1.5 mM MgCl<sub>2</sub>, and 2.5 mM CaCl<sub>2</sub>, pH 7.4, was used

571 for the recordings. Glass pipettes with a resistance of 5– 8 mΩ were filled with an internal solution  
572 consisting of 110 mM cesium gluconate, 30 mM CsCl, 5 mM HEPES, 4 mM NaCl, 0.5 CaCl<sub>2</sub>, 2mM  
573 MgCl<sub>2</sub>, 5mM BAPTA, 2 mM Na<sub>2</sub>ATP, and 0.3 mM Na<sub>2</sub>GTP, pH 7.35. Neurons were held at a holding  
574 potential of -70 mV for mEPSCs. For recording mEPSCs, 1 M tetrodotoxin and 100 M picrotoxin were  
575 added to the external recording solution. The signal was filtered at 2 kHz and digitized at 20 kHz using an  
576 Axon Digidata 1440A analog-to-digital board (Molecular Devices). Recordings were performed from  
577 three independent cultures. Recordings with a pipette access resistance of 20 m and with 20% changes  
578 during the duration of recording were included. The mEPSC recordings was analyzed using Mini Analysis  
579 software (Synapsoft) with an amplitude threshold set at 6 – 8 pA. The frequency, amplitude, and decay  
580 were measured in each group.

581

## 582 **Genome-wide RNA-sequencing and bioinformatic analyses**

583 Cortical neurons from either *Nestin-Cre; Ezh2<sup>fl/fl</sup>* or *Neurod6-Cre; Ezh2<sup>fl/fl</sup>* and their control litter  
584 mates were isolated and cultured for 3 days. Following total RNA was isolated using RNeasy Plus Kit  
585 (Qiagen), RNA was quality controlled and quantified using an Agilent 2100 Bioanalyzer. High-  
586 throughput sequencing was performed using the Illumina HiSeq 2000 platform at the JHMI deep  
587 sequencing & microarray core.

588 The data analysis of RNA-seq used the following workflows. First, transcript isoform level  
589 analysis was performed by aligning the 54 base cDNA reads against the reference genome mm9 build  
590 using a Burrows-Wheeler transform based short read aligner (BWA), and the aligned reads were  
591 visualized using Integrated Genome Viewer. The read alignment files were imported into Partek  
592 Genomics Suite (Partek® Genomics Suite™) and RPKM (reads per kilobase of exon model per million  
593 mapped reads) counts for each of the 28,157 transcripts defined in the UCSC refflat annotation file were

594 calculated. A stringent filtering criterion with RPKM value of 1.0 was used to obtain transcripts. The  
595 RPKM values of filtered transcripts were log-transformed using  $\log_2$  (RPKM + offset) with an offset value  
596 of 1.0. Fold changes in transcript expression and *p*-values were computed using ANOVA, and  
597 significantly altered transcripts were selected by applying fold change-cutoff of 2. Alternatively, gene  
598 level analysis was performed by aligning the filtered reads to the mouse reference genome build mm9  
599 using the ELAND (Efficient Local Alignment of Nucleotide Data) algorithm (Anthony J Cox, Solexa Ltd  
600 Saffron, Walden, UK). First, raw and RPKM normalized counts were calculated for gene models (as  
601 defined in [UCSC RefGene](#)). Subsequently, we applied SAM (significance analysis of microarrays) to gene  
602 level RPKM to identify RNAs with a fold change greater than 2 and false discovery rate (FDR) of less  
603 than 25%. Briefly, the boundaries of exons were obtained from the RefGene database ([Genome](#)), and the  
604 numbers of mapped reads on each exon were calculated. To compare to human data sets, mouse gene  
605 names were converted to human homologs using MGI annotation database  
606 (<http://www.informatics.jax.org/homology.shtml>). Gene ontology (biological process) was assessed using  
607 Metascape (<http://metascape.org/gp/index.html#/main/step1>) web servers on substantially expressed  
608 genes, meaning minimal  $\log_2$ (RPKM) of 1 among upregulated genes upon EZH2 deletion, or minimal  
609  $\log_2$ (RPKM) of 1 among downregulated genes in the control.

610

## 611 **Statistics**

612 All plots were generated and statistical analyses were performed using Graphpad Prism 5.0  
613 software. Results are presented as mean  $\pm$  SEM. Sample size was not predetermined but numbers of  
614 samples are consistent with previous publications. Two-tailed t-tests were used for comparison of two  
615 data sets. Equal variances between groups and normal distributions of data were presumed but not formally

616 tested. Molecular and biochemical analyses were performed using a minimum of three biological  
617 replicates per condition. Behavioral experiments require larger data sets due to increased variability.

618

619

620 **Acknowledgements:** We thank Randal Hand for the Neurod1-Cre plasmid, and Rick Horwitz for the  
621 PAK3<sup>K297R</sup> plasmid. We thank Zhongxian Jiao for mouse husbandry and Michele Pucak for technical  
622 assistance in confocal microscopy. The study was supported by grants (to F.Q.Z.) from NIH  
623 (R01NS064288, R01NS085176, R01GM111514, R01EY027347), the Craig H. Neilsen Foundation  
624 (259450), and the BrightFocus Foundation (G2017037).

625 .

626

627 **Author Contributions:** M.Z., C-M. L. and F-Q. Z. conceived the study and designed the project; M.Z.  
628 performed most of the experiments; Y.Z. and R.L.H. contributed to the in utero-electroporation  
629 experiment; Q.X., X.D., E.L. and G.D. contributed to the electrophysiological experiments; M.Z., C-M.  
630 L, J.C., and M.V.P. contributed to the mouse behavior experiments and data analysis; M.Z. and P.H.  
631 analyzed the data. G-H.W. and J.Q. analyzed the RNA-Seq data; M.Z. and F-Q.Z. wrote the manuscript  
632 with contribution from all authors.

633

634 **Competing financial interests:** The authors declare no competing financial interests

635

636

637 **Reference:**

638

639 Agger, K., Cloos, P.A., Christensen, J., Pasini, D., Rose, S., Rappsilber, J., Issaeva, I., Canaani, E., Salcini, A.E., and  
640 Helin, K. (2007). UTX and JMJD3 are histone H3K27 demethylases involved in HOX gene regulation and  
641 development. *Nature* *449*, 731-734.

642 Barnes, A.P., Lilley, B.N., Pan, Y.A., Plummer, L.J., Powell, A.W., Raines, A.N., Sanes, J.R., and Polleux, F. (2007).  
643 LKB1 and SAD kinases define a pathway required for the polarization of cortical neurons. *Cell* *129*, 549-563.

644 Beisel, C., and Paro, R. (2011). Silencing chromatin: comparing modes and mechanisms. *Nat Rev Genet* *12*, 123-  
645 135.

646 Boda, B., Jourdain, L., and Muller, D. (2008). Distinct, but compensatory roles of PAK1 and PAK3 in spine  
647 morphogenesis. *Hippocampus* *18*, 857-861.

648 Brion, J.P., Guillemot, J., and Nunez, J. (1988). Dendritic and axonal distribution of the microtubule-associated  
649 proteins MAP2 and tau in the cerebellum of the nervous mutant mouse. *Brain Res Dev Brain Res* *44*, 221-232.

650 Courchet, J., Lewis, T.L., Jr., Lee, S., Courchet, V., Liou, D.Y., Aizawa, S., and Polleux, F. (2013). Terminal axon  
651 branching is regulated by the LKB1-NUAK1 kinase pathway via presynaptic mitochondrial capture. *Cell* *153*,  
652 1510-1525.

653 Dai, X., Iwasaki, H., Watanabe, M., and Okabe, S. (2014). Dlx1 transcription factor regulates dendritic growth and  
654 postsynaptic differentiation through inhibition of neuropilin-2 and PAK3 expression. *Eur J Neurosci* *39*, 531-547.

655 De Santa, F., Totaro, M.G., Prosperini, E., Notarbartolo, S., Testa, G., and Natoli, G. (2007). The histone H3 lysine-  
656 27 demethylase Jmjd3 links inflammation to inhibition of polycomb-mediated gene silencing. *Cell* *130*, 1083-  
657 1094.

658 Di Meglio, T., Kratochwil, C.F., Vilain, N., Loche, A., Vitobello, A., Yonehara, K., Hrycaj, S.M., Roska, B., Peters,  
659 A.H., Eichmann, A., *et al.* (2013). Ezh2 orchestrates topographic migration and connectivity of mouse  
660 precerebellar neurons. *Science* *339*, 204-207.

661 Dijkhuizen, P.A., and Ghosh, A. (2005). BDNF regulates primary dendrite formation in cortical neurons via the  
662 PI3-kinase and MAP kinase signaling pathways. *J Neurobiol* *62*, 278-288.

663 Douglas, J., Hanks, S., Temple, I.K., Davies, S., Murray, A., Upadhyaya, M., Tomkins, S., Hughes, H.E., Cole, T.R.,  
664 and Rahman, N. (2003). NSD1 mutations are the major cause of Sotos syndrome and occur in some cases of  
665 Weaver syndrome but are rare in other overgrowth phenotypes. *Am J Hum Genet* *72*, 132-143.

666 Duan, Y., Wang, S.H., Song, J., Mironova, Y., Ming, G.L., Kolodkin, A.L., and Giger, R.J. (2014). Semaphorin 5A  
667 inhibits synaptogenesis in early postnatal- and adult-born hippocampal dentate granule cells. *Elife* *3*.

668 Durak, O., Gao, F., Kaeser-Woo, Y.J., Rueda, R., Martorell, A.J., Nott, A., Liu, C.Y., Watson, L.A., and Tsai, L.H.  
669 (2016). Chd8 mediates cortical neurogenesis via transcriptional regulation of cell cycle and Wnt signaling. *Nat*  
670 *Neurosci* *19*, 1477-1488.

671 Gibson, W.T., Hood, R.L., Zhan, S.H., Bulman, D.E., Fejes, A.P., Moore, R., Mungall, A.J., Eydoux, P., Babul-Hirji, R.,  
672 An, J., *et al.* (2012). Mutations in EZH2 cause Weaver syndrome. *Am J Hum Genet* *90*, 110-118.

- 673 Goebbels, S., Bormuth, I., Bode, U., Hermanson, O., Schwab, M.H., and Nave, K.A. (2006). Genetic targeting of  
674 principal neurons in neocortex and hippocampus of NEX-Cre mice. *Genesis* 44, 611-621.
- 675 Gorski, J.A., Zeiler, S.R., Tamowski, S., and Jones, K.R. (2003). Brain-derived neurotrophic factor is required for  
676 the maintenance of cortical dendrites. *J Neurosci* 23, 6856-6865.
- 677 Guan, J.S., Haggarty, S.J., Giacometti, E., Dannenberg, J.H., Joseph, N., Gao, J., Nieland, T.J., Zhou, Y., Wang, X.,  
678 Mazitschek, R., *et al.* (2009). HDAC2 negatively regulates memory formation and synaptic plasticity. *Nature* 459,  
679 55-60.
- 680 Henriquez, B., Bustos, F.J., Aguilar, R., Becerra, A., Simon, F., Montecino, M., and van Zundert, B. (2013). Ezh1  
681 and Ezh2 differentially regulate PSD-95 gene transcription in developing hippocampal neurons. *Mol Cell*  
682 *Neurosci* 57, 130-143.
- 683 Hirayama, T., Tarusawa, E., Yoshimura, Y., Galjart, N., and Yagi, T. (2012). CTCF is required for neural  
684 development and stochastic expression of clustered Pcdh genes in neurons. *Cell Rep* 2, 345-357.
- 685 Hong, S., Cho, Y.W., Yu, L.R., Yu, H., Veenstra, T.D., and Ge, K. (2007). Identification of JmjC domain-containing  
686 UTX and JMJD3 as histone H3 lysine 27 demethylases. *Proc Natl Acad Sci U S A* 104, 18439-18444.
- 687 Hwang, W.W., Salinas, R.D., Siu, J.J., Kelley, K.W., Delgado, R.N., Paredes, M.F., Alvarez-Buylla, A., Oldham, M.C.,  
688 and Lim, D.A. (2014). Distinct and separable roles for EZH2 in neurogenic astroglia. *Elife* 3, e02439.
- 689 Iossifov, I., Ronemus, M., Levy, D., Wang, Z., Hakker, I., Rosenbaum, J., Yamrom, B., Lee, Y.H., Narzisi, G., Leotta,  
690 A., *et al.* (2012). De novo gene disruptions in children on the autistic spectrum. *Neuron* 74, 285-299.
- 691 Kano, S., Colantuoni, C., Han, F., Zhou, Z., Yuan, Q., Wilson, A., Takayanagi, Y., Lee, Y., Rapoport, J., Eaton, W., *et*  
692 *al.* (2012). Genome-wide profiling of multiple histone methylations in olfactory cells: further implications for  
693 cellular susceptibility to oxidative stress in schizophrenia. *Mol Psychiatry*.
- 694 Kazdoba, T.M., Sunnen, C.N., Crowell, B., Lee, G.H., Anderson, A.E., and D'Arcangelo, G. (2012). Development  
695 and characterization of NEX- Pten, a novel forebrain excitatory neuron-specific knockout mouse. *Dev Neurosci*  
696 34, 198-209.
- 697 Kosik, K.S., and Finch, E.A. (1987). MAP2 and tau segregate into dendritic and axonal domains after the  
698 elaboration of morphologically distinct neurites: an immunocytochemical study of cultured rat cerebrum. *J*  
699 *Neurosci* 7, 3142-3153.
- 700 Lan, F., Bayliss, P.E., Rinn, J.L., Whetstone, J.R., Wang, J.K., Chen, S., Iwase, S., Alpatov, R., Issaeva, I., Canaani, E.,  
701 *et al.* (2007). A histone H3 lysine 27 demethylase regulates animal posterior development. *Nature* 449, 689-694.
- 702 Li, J., You, Y., Yue, W., Yu, H., Lu, T., Wu, Z., Jia, M., Ruan, Y., Liu, J., Zhang, D., *et al.* (2016). Chromatin  
703 remodeling gene EZH2 involved in the genetic etiology of autism in Chinese Han population. *Neurosci Lett* 610,  
704 182-186.
- 705 Liu, Y., Yu, C., Daley, T.P., Wang, F., Cao, W.S., Bhate, S., Lin, X., Still, C., 2nd, Liu, H., Zhao, D., *et al.* (2018).  
706 CRISPR Activation Screens Systematically Identify Factors that Drive Neuronal Fate and Reprogramming. *Cell*  
707 *Stem Cell* 23, 758-771 e758.



- 708 Margueron, R., and Reinberg, D. (2011). The Polycomb complex PRC2 and its mark in life. *Nature* *469*, 343-349.
- 709 Min, J., Zaslavsky, A., Fedele, G., McLaughlin, S.K., Reczek, E.E., De Raedt, T., Guney, I., Strohlic, D.E.,  
710 Macconail, L.E., Beroukhi, R., *et al.* (2010). An oncogene-tumor suppressor cascade drives metastatic prostate  
711 cancer by coordinately activating Ras and nuclear factor-kappaB. *Nat Med* *16*, 286-294.
- 712 Molyneaux, B.J., Arlotta, P., Menezes, J.R., and Macklis, J.D. (2007). Neuronal subtype specification in the  
713 cerebral cortex. *Nat Rev Neurosci* *8*, 427-437.
- 714 Morgan-Smith, M., Wu, Y., Zhu, X., Pringle, J., and Snider, W.D. (2014). GSK-3 signaling in developing cortical  
715 neurons is essential for radial migration and dendritic orientation. *Elife* *3*, e02663.
- 716 Ng, S.B., Bigham, A.W., Buckingham, K.J., Hannibal, M.C., McMillin, M.J., Gildersleeve, H.I., Beck, A.E., Tabor,  
717 H.K., Cooper, G.M., Mefford, H.C., *et al.* (2010). Exome sequencing identifies MLL2 mutations as a cause of  
718 Kabuki syndrome. *Nat Genet* *42*, 790-793.
- 719 Node-Langlois, R., Muller, D., and Boda, B. (2006). Sequential implication of the mental retardation proteins  
720 ARHGEF6 and PAK3 in spine morphogenesis. *J Cell Sci* *119*, 4986-4993.
- 721 Pascual-Lucas, M., Viana da Silva, S., Di Scala, M., Garcia-Barroso, C., Gonzalez-Aseguinolaza, G., Mulle, C.,  
722 Alberini, C.M., Cuadrado-Tejedor, M., and Garcia-Osta, A. (2014). Insulin-like growth factor 2 reverses memory  
723 and synaptic deficits in APP transgenic mice. *EMBO Mol Med* *6*, 1246-1262.
- 724 Pereira, J.D., Sansom, S.N., Smith, J., Dobenecker, M.W., Tarakhovskiy, A., and Livesey, F.J. (2010). Ezh2, the  
725 histone methyltransferase of PRC2, regulates the balance between self-renewal and differentiation in the  
726 cerebral cortex. *Proc Natl Acad Sci U S A* *107*, 15957-15962.
- 727 Rakic, P. (1972). Mode of cell migration to the superficial layers of fetal monkey neocortex. *J Comp Neurol* *145*,  
728 61-83.
- 729 Saijilafu, Hur, E.M., Liu, C.M., Jiao, Z., Xu, W.L., and Zhou, F.Q. (2013). PI3K-GSK3 signalling regulates mammalian  
730 axon regeneration by inducing the expression of Smad1. *Nat Commun* *4*, 2690.
- 731 Schmeisser, M.J., Baumann, B., Johannsen, S., Vindedal, G.F., Jensen, V., Hvalby, O.C., Sprengel, R., Seither, J.,  
732 Maqbool, A., Magnutzki, A., *et al.* (2012). I kappa B kinase/nuclear factor kappa B-dependent insulin-like growth  
733 factor 2 (Igf2) expression regulates synapse formation and spine maturation via Igf2 receptor signaling. *J*  
734 *Neurosci* *32*, 5688-5703.
- 735 Schoeftner, S., Sengupta, A.K., Kubicek, S., Mechtler, K., Spahn, L., Koseki, H., Jenuwein, T., and Wutz, A. (2006).  
736 Recruitment of PRC1 function at the initiation of X inactivation independent of PRC2 and silencing. *EMBO J* *25*,  
737 3110-3122.
- 738 Schwab, M.H., Bartholomae, A., Heimrich, B., Feldmeyer, D., Druffel-Augustin, S., Goebels, S., Naya, F.J., Zhao,  
739 S., Frotscher, M., Tsai, M.J., *et al.* (2000). Neuronal basic helix-loop-helix proteins (NEX and BETA2/Neuro D)  
740 regulate terminal granule cell differentiation in the hippocampus. *J Neurosci* *20*, 3714-3724.
- 741 Su, I.H., Basavaraj, A., Krutchinsky, A.N., Hobert, O., Ullrich, A., Chait, B.T., and Tarakhovskiy, A. (2003). Ezh2  
742 controls B cell development through histone H3 methylation and Igh rearrangement. *Nat Immunol* *4*, 124-131.

- 743 Tatton-Brown, K., Hanks, S., Ruark, E., Zachariou, A., Duarte Sdel, V., Ramsay, E., Snape, K., Murray, A., Perdeaux,  
744 E.R., Seal, S., *et al.* (2011). Germline mutations in the oncogene EZH2 cause Weaver syndrome and increased  
745 human height. *Oncotarget* 2, 1127-1133.
- 746 Van Aelst, L., and Cline, H.T. (2004). Rho GTPases and activity-dependent dendrite development. *Curr Opin*  
747 *Neurobiol* 14, 297-304.
- 748 von Schimmelmann, M., Feinberg, P.A., Sullivan, J.M., Ku, S.M., Badimon, A., Duff, M.K., Wang, Z., Lachmann, A.,  
749 Dewell, S., Ma'ayan, A., *et al.* (2016). Polycomb repressive complex 2 (PRC2) silences genes responsible for  
750 neurodegeneration. *Nat Neurosci* 19, 1321-1330.
- 751 Wu, S.X., Goebbels, S., Nakamura, K., Kometani, K., Minato, N., Kaneko, T., Nave, K.A., and Tamamaki, N. (2005).  
752 Pyramidal neurons of upper cortical layers generated by NEX-positive progenitor cells in the subventricular zone.  
753 *Proc Natl Acad Sci U S A* 102, 17172-17177.
- 754 Zhang, H., Webb, D.J., Asmussen, H., Niu, S., and Horwitz, A.F. (2005). A GIT1/PIX/Rac/PAK signaling module  
755 regulates spine morphogenesis and synapse formation through MLC. *J Neurosci* 25, 3379-3388.
- 756 Zhang, J., Ji, F., Liu, Y., Lei, X., Li, H., Ji, G., Yuan, Z., and Jiao, J. (2014). Ezh2 regulates adult hippocampal  
757 neurogenesis and memory. *J Neurosci* 34, 5184-5199.
- 758 Zhao, L., Li, J., Ma, Y., Wang, J., Pan, W., Gao, K., Zhang, Z., Lu, T., Ruan, Y., Yue, W., *et al.* (2015). Ezh2 is involved  
759 in radial neuronal migration through regulating Reelin expression in cerebral cortex. *Sci Rep* 5, 15484.
- 760
- 761

762 **Figure legends**

763 **Figure 1. Deletion of H3K27 methyltransferase *Ezh2* in post-mitotic neurons**

764 (a) Representative images showing the deletion of EZH2 in Cre-positive hippocampal neurons of *Ezh2*<sup>Δ/Δ</sup>  
765 mice *in vitro* detected by immunostaining of EZH2. The white arrows indicate the Tuj1 positive neurons.

766 Scale bar, 20μm.

767 (b) Quantification of the fluorescence intensity of EZH2 staining shown in (a). n=74 and 91 for the control  
768 and *Ezh2*<sup>Δ/Δ</sup> neurons, respectively, from three independent experiments. \*\*\*\**P*<0.0001.

769 (c) Representative images showing reduced level of H3K27me3 expression in Cre-positive hippocampal  
770 neurons *in vitro*. The white arrows in the upper panel indicate Cre negative neurons from the control mice.  
771 The white arrows in the bottom panel indicate the Cre positive neurons from the *Ezh2*<sup>Δ/Δ</sup> mice, whereas  
772 the red arrow indicates a Cre negative neuron. Scale bar, 20μm.

773 (d) Quantification of the fluorescence intensity of H3K27me3 staining shown in (c). n=45 and 37 for the  
774 control and *Ezh2*<sup>Δ/Δ</sup> neurons, respectively, from three independent experiments. \*\*\*\**P*<0.0001.

775 (e) Representative images showing reduced level of H3K27me3 in cortical neurons from cortical slices of  
776 *Ezh2*<sup>Δ/Δ</sup> mice *in vivo* by immunostaining of H3K27me3. The white arrows in the bottom panel indicate  
777 the Cre positive neurons in the *Ezh2*<sup>Δ/Δ</sup> cortical slices, and the red arrow indicates a Cre negative neuron.  
778 Scale bar, 20μm.

779 (f) Quantification of the fluorescence intensity of H3K27me3 staining shown in (e). n=103 and 111  
780 neurons for the control and *Ezh2*<sup>Δ/Δ</sup> neurons, respectively, from three independent experiments.  
781 \*\*\*\**P*<0.0001.

782 (g) Representative western blot images showing significant reduction of EZH2 protein levels in cortical  
783 lysate from *Ezh2*<sup>Δ/Δ</sup> mice compared to control at P0. Histone 3 (H3) was used as the loading control.

784 (h) Quantification of western blot results shown in (g) by measuring the ratio of EZH2 and H3, and the  
785 data were normalized to the control ( $P=0.0117$ ,  $n=5$  mice for each condition).

786 Data are represented as mean  $\pm$  SEM.  $*P<0.05$ ,  $**P<0.01$ ,  $***P<0.001$ ,  $****P < 0.0001$ , compared to  
787 control if not designated.

788

789 **Figure 2. Knocking out EZH2 in cortical neurons delayed the migration of upper cortical neurons**

790 (a) Representative images of mouse cortex immunostained for Foxp1 and Ctip2 in control and  $EZH2^{\Delta/\Delta}$   
791 mice at P0. Foxp1 and Ctip2 labeling help to define the layer II-IV and IV-V of the cortical plate,  
792 respectively. The distributions of labeled cells were assigned into 6 bins across the apicobasal axis. Scale  
793 bar, 100  $\mu\text{m}$ .

794 (b) Quantification of Foxp1 positive cells in 6 equal bins showing significantly reduced Foxp1 positive  
795 neurons in Bin 5 (Bin1,  $P=0.2495$ ; Bin2,  $P=0.1263$ ; Bin3,  $P=0.9192$ ; Bin4,  $P=0.5790$ ; Bin5,  $P=0.0213$ ,  
796  $n=3$  mice for each condition).

797 (c) Quantification of Ctip2 positive cells in 6 equal bins showing significantly increased Ctip2 positive  
798 neurons in Bin 3 (Bin1,  $P=0.1885$ ; Bin2,  $P=0.0822$ ; Bin3,  $P=0.016$ ; Bin4,  $P=0.8954$ ,  $n=3$  mice for each  
799 condition).

800 (d) Representative confocal images of  $EZH2^{ff}$  mice mouse cortices in utero electroporated with dsRed or  
801 dsRed/*Neurod1-Cre*. The electroporation was done at E15 and pups were sacrificed at P0 for analysis.  
802 The two white dashed line boxes in the upper panels were enlarged and presented in the bottom panels.  
803 Scale bar, 200  $\mu\text{m}$  in the upper panels and 50  $\mu\text{m}$  in the bottom panels.

804 (e) Quantification of dsRed positive cells in mouse cortices of (d) showing significantly increased number  
805 of cells at Bin1 but reduced number of cells at Bin6 in mice electroporated with Neurod1-Cre (Bin1,

806  $P=0.0325$ ; Bin2,  $P=0.0019$ ; Bin3,  $P=0.1375$ ; Bin4,  $P=0.2140$ ; Bin5,  $P=0.2502$ ; Bin6,  $P=0.0016$ ;  $n=3$  mice  
807 for each condition).

808 Data are presented as mean  $\pm$  SEM. \* $P<0.05$ , \*\* $P<0.01$ , \*\*\* $P<0.001$ , \*\*\*\* $P<0.0001$ , compared to control  
809 if not designated.

810

811 **Figure 3. Loss of EZH2 increased dendritic branching *in vitro*.**

812 (a) Representative images of cultured hippocampal neurons from control and *Ezh2<sup>Δ/Δ</sup>* mice stained with  
813 Cre and MAP2 antibodies. Scale bar, 20  $\mu\text{m}$ .

814 (b) Representative images of several MAP2 stained hippocampal neurons from control and *Ezh2<sup>Δ/Δ</sup>* mice.  
815 Note the increased dendritic branching of neurons from the *Ezh2<sup>Δ/Δ</sup>* mice. Scale bar, 20  $\mu\text{m}$ .

816 (c) Sholl analysis of hippocampal neurons from control and *EZH2<sup>Δ/Δ</sup>* mice showing that, compared with  
817 that of the control mice, the neurons of the *EZH2<sup>Δ/Δ</sup>* mice had increased dendritic branching. ( $P=0.2759$   
818 at 10 $\mu\text{m}$ ;  $P=0.0006$  at 20  $\mu\text{m}$ ;  $P=0.0006$  at 30  $\mu\text{m}$ ;  $P=0.0004$  at 40  $\mu\text{m}$ ;  $P=0.0023$  at 50  $\mu\text{m}$ ;  $P=$   
819 0.0006 at 60  $\mu\text{m}$ ;  $P=0.0174$  at 70  $\mu\text{m}$ ;  $P=0.0757$  at 80  $\mu\text{m}$ ;  $P=0.0078$  at 90  $\mu\text{m}$ ;  $P=0.0007$  at 100  $\mu\text{m}$ ;  
820  $P=0.0012$  at 110  $\mu\text{m}$ ;  $n=30$  and 32 neurons of control and *Ezh2<sup>Δ/Δ</sup>* mice, respectively, each from 3 to 4  
821 mice).

822 (d) Quantification of normalized average dendritic branch length (ADBL) of control and *EZH2<sup>Δ/Δ</sup>* neurons  
823 ( $P=0.0441$ ,  $n=35$  and 32 neurons from the control and the *Ezh2<sup>Δ/Δ</sup>* mice, respectively, from 3 independent  
824 experiments).

825 (e) Quantification of normalized total dendritic branch tip number (TDBTN) of control and *EZH2<sup>Δ/Δ</sup>*  
826 neurons ( $P<0.0001$ ,  $n=35$  and 32 neurons from the control and the *Ezh2<sup>Δ/Δ</sup>* mice, respectively, from 3  
827 independent experiments).

828 (f) Quantification of normalized total dendritic branch length (TDBL) of control and  $EZH2^{\Delta/\Delta}$  neurons  
829 ( $P < 0.0001$ ,  $n = 35$  and  $32$  neurons from the control and the  $Ezh2^{\Delta/\Delta}$  mice, respectively, from 3 independent  
830 experiments).

831 Data are presented as mean  $\pm$  SEM. \* $P < 0.05$ , \*\* $P < 0.01$ , \*\*\* $P < 0.001$ , \*\*\*\* $P < 0.0001$ , compared to control  
832 if not designated.

833

834 **Figure 4. Lack of EZH2 increased the basal dendritic branching *in vivo***

835 (a) Representative images of  $Ezh2^{\Delta/\Delta}$ ; Thy1-GFP mice. GFP expression was detected at cortical and  
836 hippocampal region. SS indicates the somatosensory cortex and CA1 indicates the CA1 region of the  
837 hippocampus. Scale bar, 1 mm.

838 (b) Representative images of cortical neurons in  $Ezh2^{fl/fl}$ ; Thy1-GFP and  $Ezh2^{\Delta/\Delta}$ ; Thy1-GFP mice. Scale  
839 bar, 20  $\mu$ m

840 (c) Representative drawing of neurons in  $Ezh2^{fl/fl}$ ; Thy1-GFP (left panel) and  $Ezh2^{\Delta/\Delta}$ ; Thy1-GFP (middle  
841 panel) mice. The orange colored are basal dendrites and the blue colored are apical dendrites. The right  
842 panel shows a representative image of a GFP labeled cortical neuron. Scale bar, 20  $\mu$ m

843 (d) Sholl analysis for apical dendrites of cortical neurons showing no significant difference in dendritic  
844 trees between control and  $Ezh2^{\Delta/\Delta}$  cortical neurons ( $n = 14$  neurons from 4 mice for each condition).

845 (e) Sholl analysis for basal dendrites of cortical neurons showing significantly increased complexity of  
846  $Ezh2^{\Delta/\Delta}$  cortical neurons, compared with that of control mice ( $P = 0.03$  at 25  $\mu$ m,  $n = 14$  neurons from 4 mice  
847 for each condition).

848 (f) Quantification of normalized average dendritic branch length (ADBL) of control and  $Ezh2^{\Delta/\Delta}$  neurons  
849 *in vivo* ( $P = 0.0014$ ,  $n = 18$  and  $17$  neurons for the control and the  $Ezh2^{\Delta/\Delta}$  mice, respectively, from 4 mice  
850 from each condition).

851 (g) Quantification of normalized total dendritic branch tip number (TDBTN) of control and *Ezh2<sup>Δ/Δ</sup>*  
852 neurons *in vivo* ( $P=0.0211$ ,  $n=18$  and  $17$  neurons for the control and the *Ezh2<sup>Δ/Δ</sup>* mice, respectively, from  
853 4 mice from each condition).

854 (h) Quantification of normalized total dendritic branch length (TDBL) of control and *Ezh2<sup>Δ/Δ</sup>* neurons *in*  
855 *vivo* ( $P=0.0879$ ,  $n=18$  and  $17$  neurons for the control and the *Ezh2<sup>Δ/Δ</sup>* mice, respectively, from 4 mice from  
856 each condition).

857 Data are presented as mean  $\pm$  SEM. \* $P<0.05$ , \*\* $P<0.01$ , \*\*\* $P<0.001$ , \*\*\*\* $P < 0.0001$ , compared to control  
858 if not designated.

859

860 **Figure 5. Spine density was increased in CA1 region of *EZH2<sup>Δ/Δ</sup>* animals**

861 (a) Representative images of increased spine density in basal region of hippocampal neurons from control  
862 and *Ezh2<sup>Δ/Δ</sup>* mice. The yellow images are white images processed with the software iMaris.

863 (b) Quantification of spine density in the basal region of hippocampal neurons from control and *Ezh2<sup>Δ/Δ</sup>*  
864 mice ( $P=0.0260$ ,  $n=28$  and  $24$  neurons for the control and the *Ezh2<sup>Δ/Δ</sup>* mice, respectively, from 4 mice for  
865 each condition).

866 (c) Left: quantification analysis of different spine types in basal region of hippocampal neurons from  
867 control and *Ezh2<sup>Δ/Δ</sup>* mice ( $P=0.0003$  for mushroom;  $P=6.86624E-05$  for filopodia;  $n=15$  and  $11$  neurons  
868 for the control and the *Ezh2<sup>Δ/Δ</sup>* mice, respectively, from 4 mice for each condition. Right: diagram showing  
869 4 different spine types.

870 (d) Representative traces of mEPSCs of hippocampal neurons from control and *Ezh2<sup>Δ/Δ</sup>* mice

871 (e) Quantification of average frequency and amplitude of mEPSCs of hippocampal neurons from control  
872 and *Ezh2<sup>Δ/Δ</sup>* mice (Frequency:  $P=0.0348$ ; Amplitude:  $P=0.8299$ ,  $n=11$  and  $15$  neurons for the control and  
873 the *Ezh2<sup>Δ/Δ</sup>* mice, respectively, from 4 independent experiments for each condition).

874 Data are presented as mean  $\pm$  SEM. \* $P$ <0.05, \*\* $P$ <0.01, \*\*\* $P$ <0.001, \*\*\*\* $P$  < 0.0001, compared to control  
875 if not designated.

876

877 **Figure 6. RNA-seq analysis of gene transcription in *Nestin-Cre; Ezh2<sup>ff</sup>* and *EZH2<sup>ΔΔ</sup>* neurons**

878 (a) Workflow of collecting excitatory neurons from control, *Nestin-Cre; Ezh2<sup>ff</sup>*, and *EZH2<sup>ΔΔ</sup>* mice for  
879 RNA-seq analysis.

880 (b) Gene ontology analysis of upregulated and downregulated differential expressed genes in *Nestin-Cre;*  
881 *Ezh2<sup>ff</sup>* and *EZH2<sup>ΔΔ</sup>* mice, compared to that of the control mice.

882 (c) Venn diagram representing the number of DEGs between SFARI autism genes and *Nestin-Cre; Ezh2<sup>ff</sup>*  
883 or *EZH2<sup>ΔΔ</sup>* mice.

884 (d) Quantitative Reverse Transcription PCR analysis of selected DEGs in excitatory neurons in wildtype  
885 and *EZH2<sup>ΔΔ</sup>* mice ( $P$ = 0.02 for PAK3,  $P$ = 0.02 for BDNF,  $P$ = 0.0007 for EZH2, respectively, n=3  
886 independent experiments).

887 Data are presented as mean  $\pm$  SEM. \* $P$ <0.05, \*\* $P$ <0.01, \*\*\* $P$ <0.001, \*\*\*\* $P$  < 0.0001, compared to control  
888 if not designated.

889

890 **Figure 7. EZH2 regulates dendritic spine development by repressing gene PAK3**

891 (a) Representative western blot images showing the expression of EZH2 and PAK3 in hippocampal  
892 neurons after different period of culturing.

893 (b) Representative western blot images showing increased level of PAK3 in neuronal lysis from *EZH2<sup>ΔΔ</sup>*  
894 mice, compared to that from control mice.

895 (c) Diagram showing the PAK3 promoter region, which is artificially separated into three regions, R1 to  
896 R3.



897 (d) Representative PCR gel images showing H3K27me3 antibody associated ChIP analysis using P7  
898 mouse cortical tissues.

899 (e) Quantitative reverse transcription PCR analysis of the H3K27me3 ChIP assay shown in (d) ( $P=0.029$ ,  
900  $n=3$  independent experiments).

901 (f) Representative images of dendritic spines of cultured control neurons, *EZH2 $\Delta/\Delta$*  neurons, and *EZH2 $\Delta/\Delta$*   
902 neurons expressing dominant negative PAK3 (PAK3<sup>DN</sup>). Note that repression of PAK3 function was able  
903 to reduced the increased spine density in *EZH2 $\Delta/\Delta$*  neurons. Scale bar, 5 $\mu$ m

904 (g) Quantification of spine densities shown in (f) ( $n=26$ , 31, and 30 neurons for the control, *EZH2 $\Delta/\Delta$*  and  
905 PAK3<sup>DN</sup> neurons, respectively, from 4 independent experiments.  $P=0.0079$  between control and *EZH2 $\Delta/\Delta$*   
906 neurons;  $P=0.0293$  between *EZH2 $\Delta/\Delta$*  and PAK3<sup>DN</sup> neurons).

907 Data are presented as mean  $\pm$  SEM. n.s., no significant difference, \* $P<0.05$ , \*\* $P<0.01$ , \*\*\* $P<0.001$ , \*\*\*\* $P$   
908  $<0.0001$ , compared to control if not designated.

909

910 **Figure 8. *EZH2 $\Delta/\Delta$*  mutant mice deficient working and recognition memory**

911 (a) Left: diagram of Y maze spontaneous alternation test for examining spatial working memory and  
912 spatial recognition memory. Right: diagram of the novel objective recognition test.

913 (b) Quantification of the percentage of correct alternation between Y maze arms. The result revealed that  
914 *EZH2 $\Delta/\Delta$*  mutant mice have impaired spatial working memory.  $P=3.02523E-05$ ,  $n=12$  for either *EZH2 $\Delta/\Delta$*   
915 or control mice.

916 (c) Quantification of the percentage of time spent in the novel arm relative to the total duration of visits in  
917 the three arms during the test phase. Note that *EZH2 $\Delta/\Delta$*  mutant mice showed reduced recognition memory.  
918  $n=25$  for control mice and  $n=18$  for *EZH2 $\Delta/\Delta$*  mice,  $P=0.0174$ .

919 (d) Quantification of novel object recognition memory in *EZH2<sup>Δ/Δ</sup>* mutant mice. Note that *EZH2<sup>Δ/Δ</sup>* mice  
920 spent shorter percentage time in novel object. n=15 for control mice and n=20 for *EZH2<sup>Δ/Δ</sup>* mice,  $P=0.0423$ .

921 (e) Quantification of the percentage of alternation between Y maze arms. The result revealed that both  
922 male and female *EZH2<sup>Δ/Δ</sup>* mutant mice have impaired short-term working memory. Female: n=10 for  
923 control mice and n=16 for *EZH2<sup>Δ/Δ</sup>* mice,  $P=0.01$ ; Male: n=15 for control mice and n=9 for *EZH2<sup>Δ/Δ</sup>* mice,  
924  $P=0.001$ .

925 (f) Quantification of the percentage of time spent in novel arms. The result revealed that both male and  
926 female *EZH2<sup>Δ/Δ</sup>* mice have impaired short-term working memory. Female: n=10 for control mice and n=16  
927 for *EZH2<sup>Δ/Δ</sup>* mice,  $P=0.0265$ ; Male: n=15 for control mice and n=9 for *EZH2<sup>Δ/Δ</sup>* mice,  $P=0.0251$ .

928 Data are presented as mean  $\pm$  SEM. n.s., no significant difference,  $*P<0.05$ ,  $**P<0.01$ ,  $***P<0.001$ ,  $****P$   
929  $<0.0001$ , compared to control if not designated.

930

931 **Supplementary figure legends**

932 **Supplementary Figure S1. Expression of EZH2, SUZ12, and H3K27me3 in cultured excitatory**  
933 **neurons**

934 (a) Representative images showing the expression of EZH2, SUZ12 and H3K27me3 in cultured primary  
935 cortical neurons. Yellow arrowheads indicate Tuj1 positive neurons. Scale bar, 50 $\mu$ m.

936 (b) Top: representative images of P0 mouse coronal brain section stained with anti-Cre antibody showing  
937 the expression of Cre at cortical and hippocampal region. Bottom: the enlarged images of two white  
938 dashed boxes shown in the top panel. Scale bar, 500 $\mu$ m in the bottom panel and 2 mm in the top panel.

939 (c) NeuroD6-Cre mediated recombination in the adult mouse brain was confirmed by RT-PCR.  
940 Representative PCR band image showing a 254bp fragment generated by NeuroD6-Cre mediated *Ezh2*  
941 deletion.

942

943 **Supplementary Figure S2. Deletion of EZH2 manifested no structural brain abnormalities**

944 (a) Representative nissl staining images of coronal sections from P0 control and *Ezh2* <sup>$\Delta/\Delta$</sup>  mice showing no  
945 obvious difference between the control and the *Ezh2* <sup>$\Delta/\Delta$</sup>  mice.

946 (b) Representative images of coronal brain sections stained with anti-Tbr1 antibody and DAPI showing  
947 that *Ezh2* <sup>$\Delta/\Delta$</sup>  mice have normal early neurogenesis at E14.5. Scale bar, 100 $\mu$ m

948

949 **Supplementary Figure S3. Lack of EZH2 did not impair the cortical neuronal migration on P7**

950 Representative confocal images of mouse cortices in utero electroporated with dsRED or dsRED/NeuroD-  
951 cre. The electroporation was performed at E15 and the pups were harvest at P7.

952

953 **Supplementary Figure S4. Spine density was increased in somatosensory cortex of *EZH2* <sup>$\Delta/\Delta$</sup>  animals**

- 954 (a) Representative images of increased spine density in basal region of layer IV-V neurons from *Ezh2<sup>fl/fl</sup>*;  
955 Thy1-GFP and *Ezh2<sup>Δ/Δ</sup>*; Thy1-GFP mice.
- 956 (b) Quantification analysis of spine density in deep region of cortical neurons from control and *Ezh2<sup>Δ/Δ</sup>*  
957 mice. n=25 for control mice and n=26 for *Ezh2<sup>Δ/Δ</sup>* mice,  $P=0.0002$ .
- 958 (c) Representative images of increased spine density in basal region of layer II-III neurons from *Ezh2<sup>fl/fl</sup>*;  
959 and *Ezh2<sup>Δ/Δ</sup>* mice labeled with Golgi staining.
- 960 (d) Quantification analysis of spine density in layer II-III region of cortical neurons from control and  
961 *Ezh2<sup>Δ/Δ</sup>* mice. n=25 for control mice and n=26 for *Ezh2<sup>Δ/Δ</sup>* mice,  $P=0.0095$ .
- 962 Data are presented as mean  $\pm$  SEM. n.s., no significant difference,  $*P<0.05$ ,  $**P<0.01$ ,  $***P<0.001$ ,  $****P$   
963  $< 0.0001$ , compared to control if not designated.

964

965 **Supplementary Figure S5. Network of enriched gene ontology (GO) terms among each differential**  
966 **gene set depicts connections among GO terms.**

967 Subgroups of enriched GO terms shown in Figure 6 have been plotted and visualized using the Metascape  
968 (<http://metascape.org>) and Cytoscape5. The program constructs GO term network among terms with a  
969 similarity  $> 0.3$ , which are connected by edges. Each node represents one enriched GO term, where node  
970 size is the number of genes within a GO term. GO terms within the same cluster are visualized with the  
971 same color.  $P$ -values of the enrichments refer back to the Figure 6, which shows maximal level of  $p$ -value  
972 is  $1.0E-3$ .

- 973 (a) GO term network of downregulated genes in the Nestin-Cre;EZH2<sup>fl/fl</sup> compared with the control.
- 974 (b) GO term network of downregulated genes in the Neurod6 (Nex)-Cre;EZH2<sup>fl/fl</sup> compared with the  
975 control.
- 976 (c) GO term network of upregulated genes in the Nestin-Cre;EZH2<sup>fl/fl</sup> compared with the control.

977 (d) GO term network of upregulated genes in the Neurod6 (Nex)-Cre;EZH2<sup>fl/fl</sup> compared with the control.

978

979 **Supplementary Figure S6. *EZH2*<sup>Δ/Δ</sup> mutant mice show little defects in elevated plus maze test and**  
980 **the open field test**

981 (a) Quantification of time spent in the open arms of the elevated plus maze. Female: n=10 mice for control  
982 mice and n=16 for *Ezh2*<sup>Δ/Δ</sup> mice,  $P=0.6808$ ; male: n=15 for control mice and n=9 for *Ezh2*<sup>Δ/Δ</sup> mice,  $P$   
983  $=0.6093$ .

984 (b) Quantification of time spent in the closed arms of the elevated plus maze. Female: n=10 for the control  
985 group and n=16 for the *Ezh2*<sup>Δ/Δ</sup> group,  $P=0.6808$ ; male: n=15 for control mice and n=9 for *Ezh2*<sup>Δ/Δ</sup> mice,  
986  $P=0.6093$ .

987 (c-e) Quantification of alterations in time spent peripheral zone (c), central zone (d), and the rearing  
988 behavior (e). Female: n=10 for control mice and n=16 for *Ezh2*<sup>Δ/Δ</sup> mice; male: n=15 for control mice and  
989 n=9 for *Ezh2*<sup>Δ/Δ</sup> mice. Open field peripheral:  $P=0.8551$  for female mice and  $P=0.2052$  for male mice.  
990 Open field center:  $P=0.8561$  for female mice and  $P=0.3643$  for male mice. Open field rearing:  $P=0.4703$   
991 for female mice and  $P=0.1854$  for male mice.

992 Data are presented as mean  $\pm$  SEM. n.s., no significant difference, \* $P<0.05$ , \*\* $P<0.01$ , \*\*\* $P<0.001$ , \*\*\*\* $P$   
993  $<0.0001$ , compared to control if not designated.

994

## Figure 1

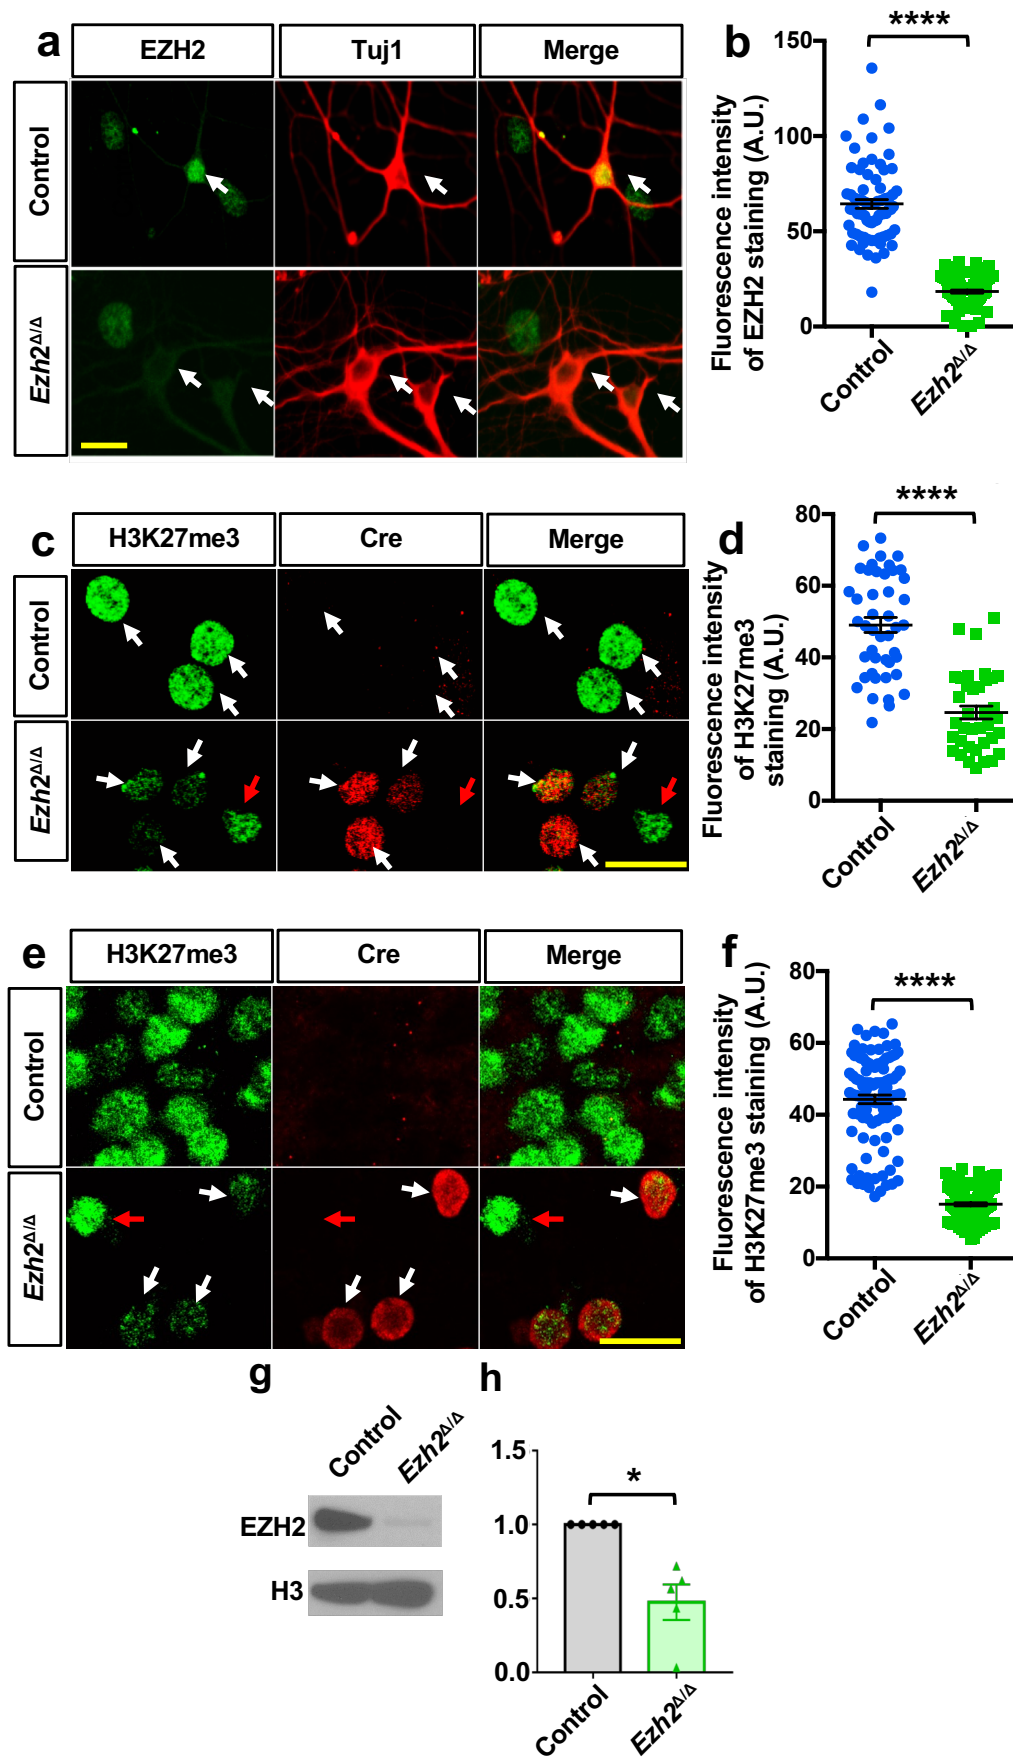

**Figure 2**

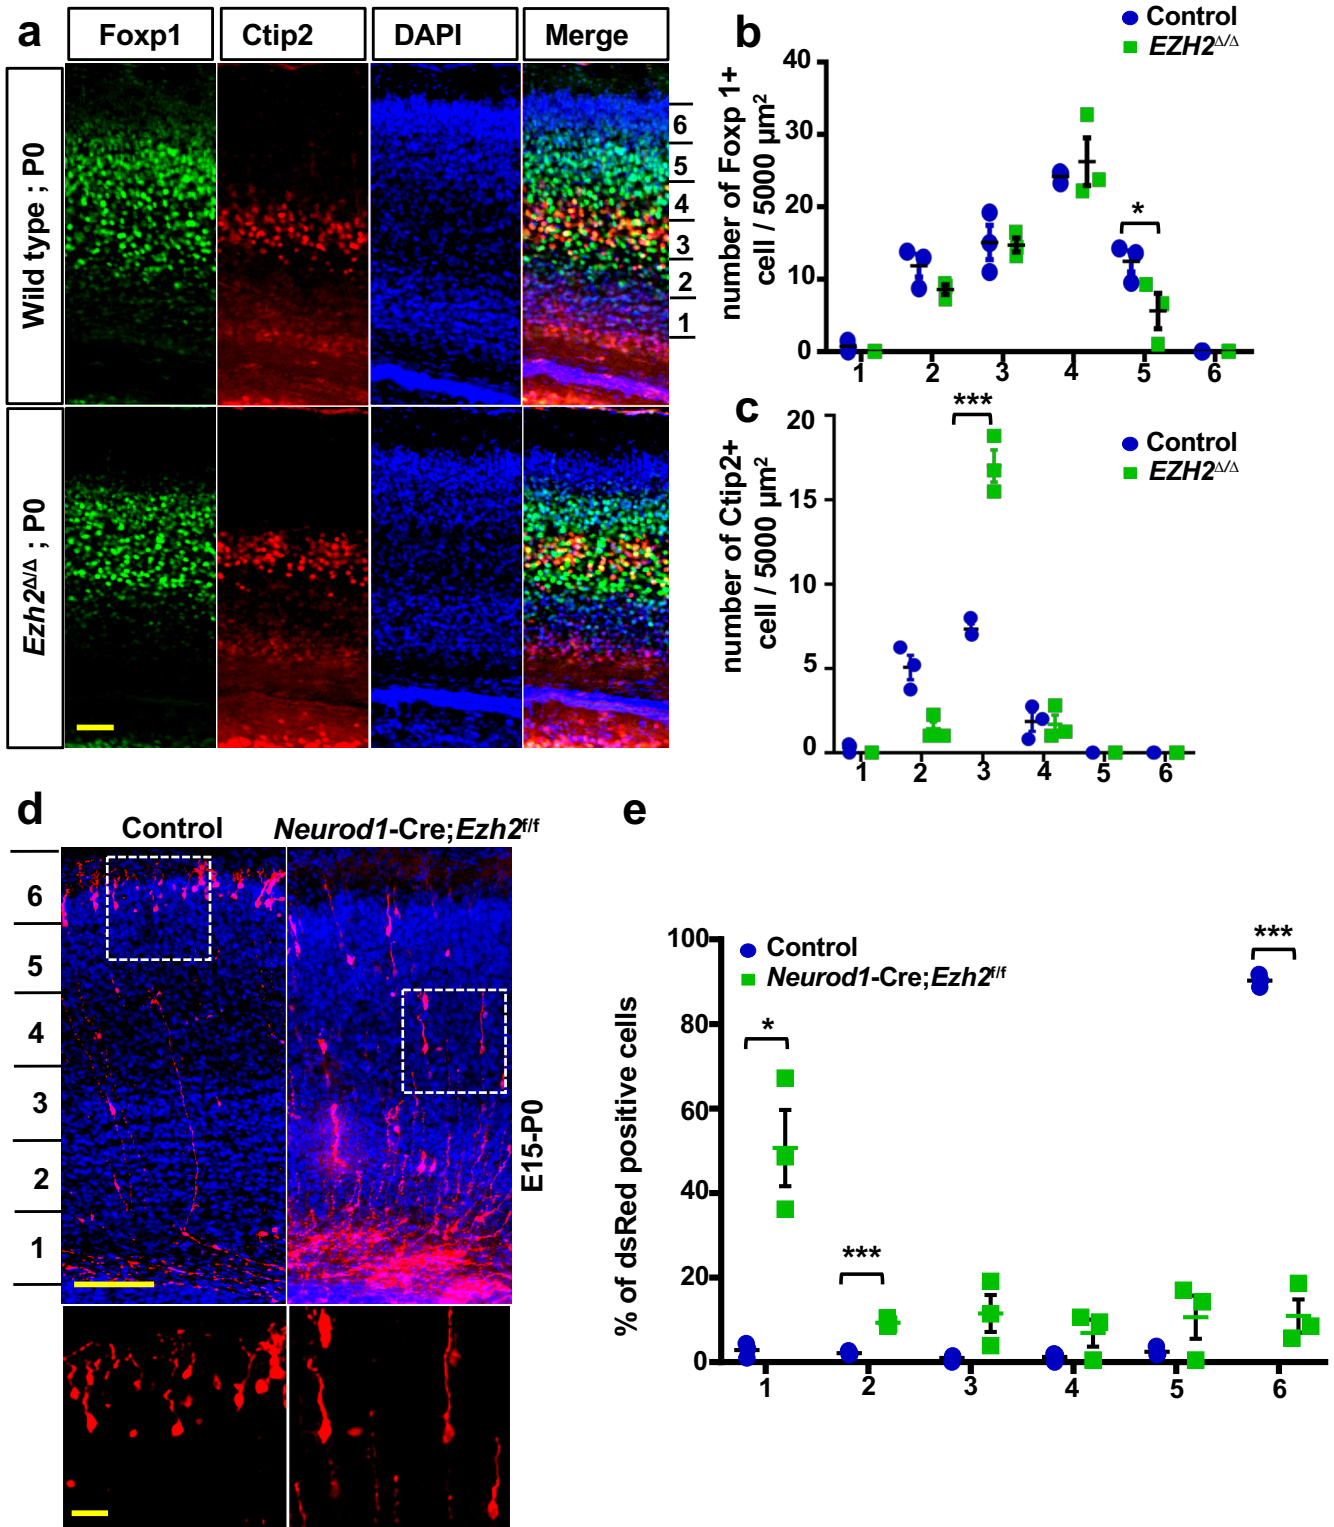

Figure 3

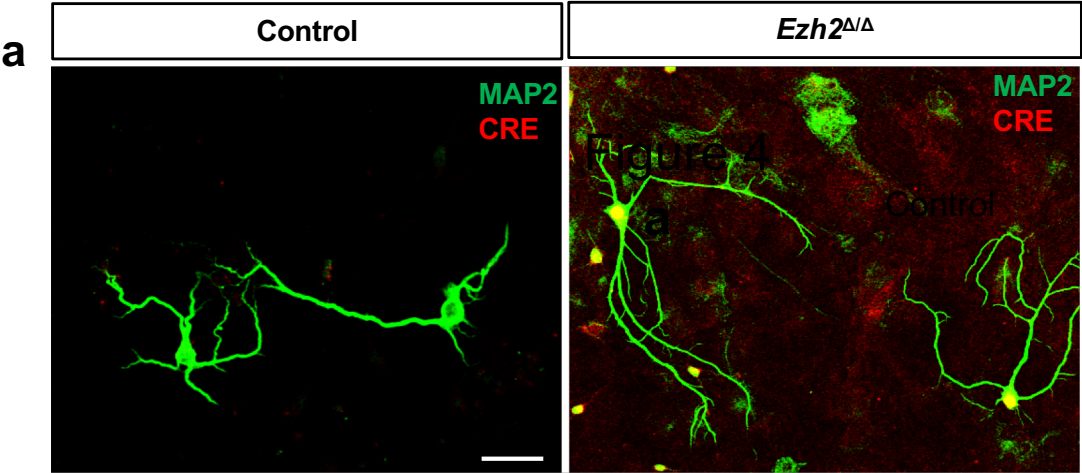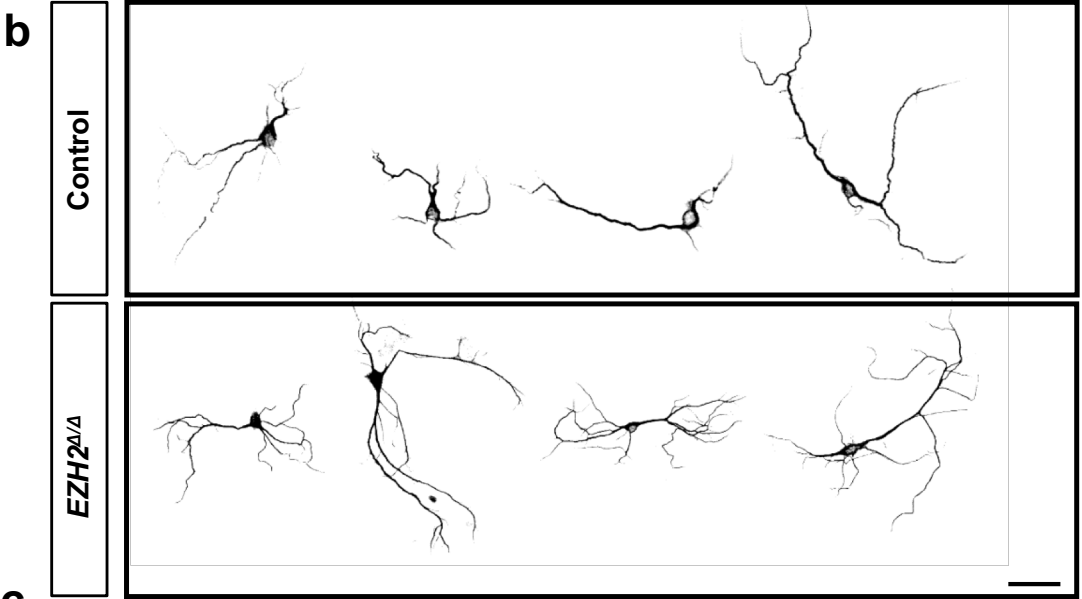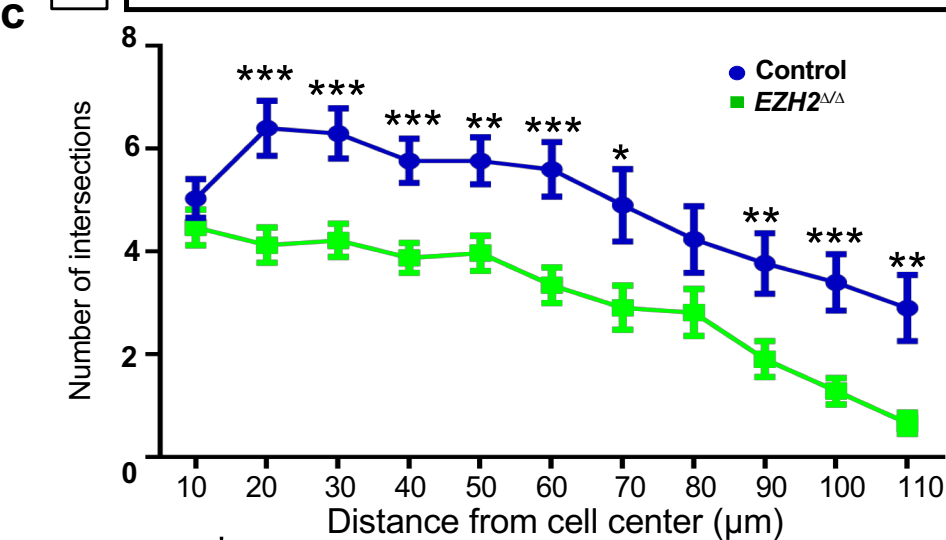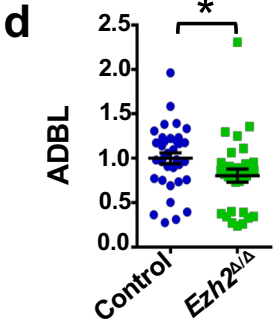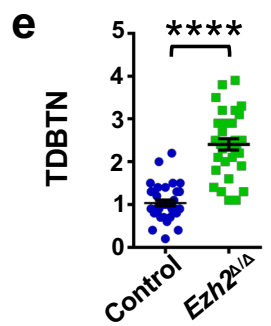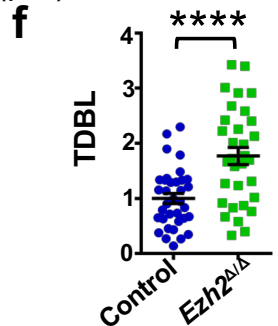



**Figure 4**

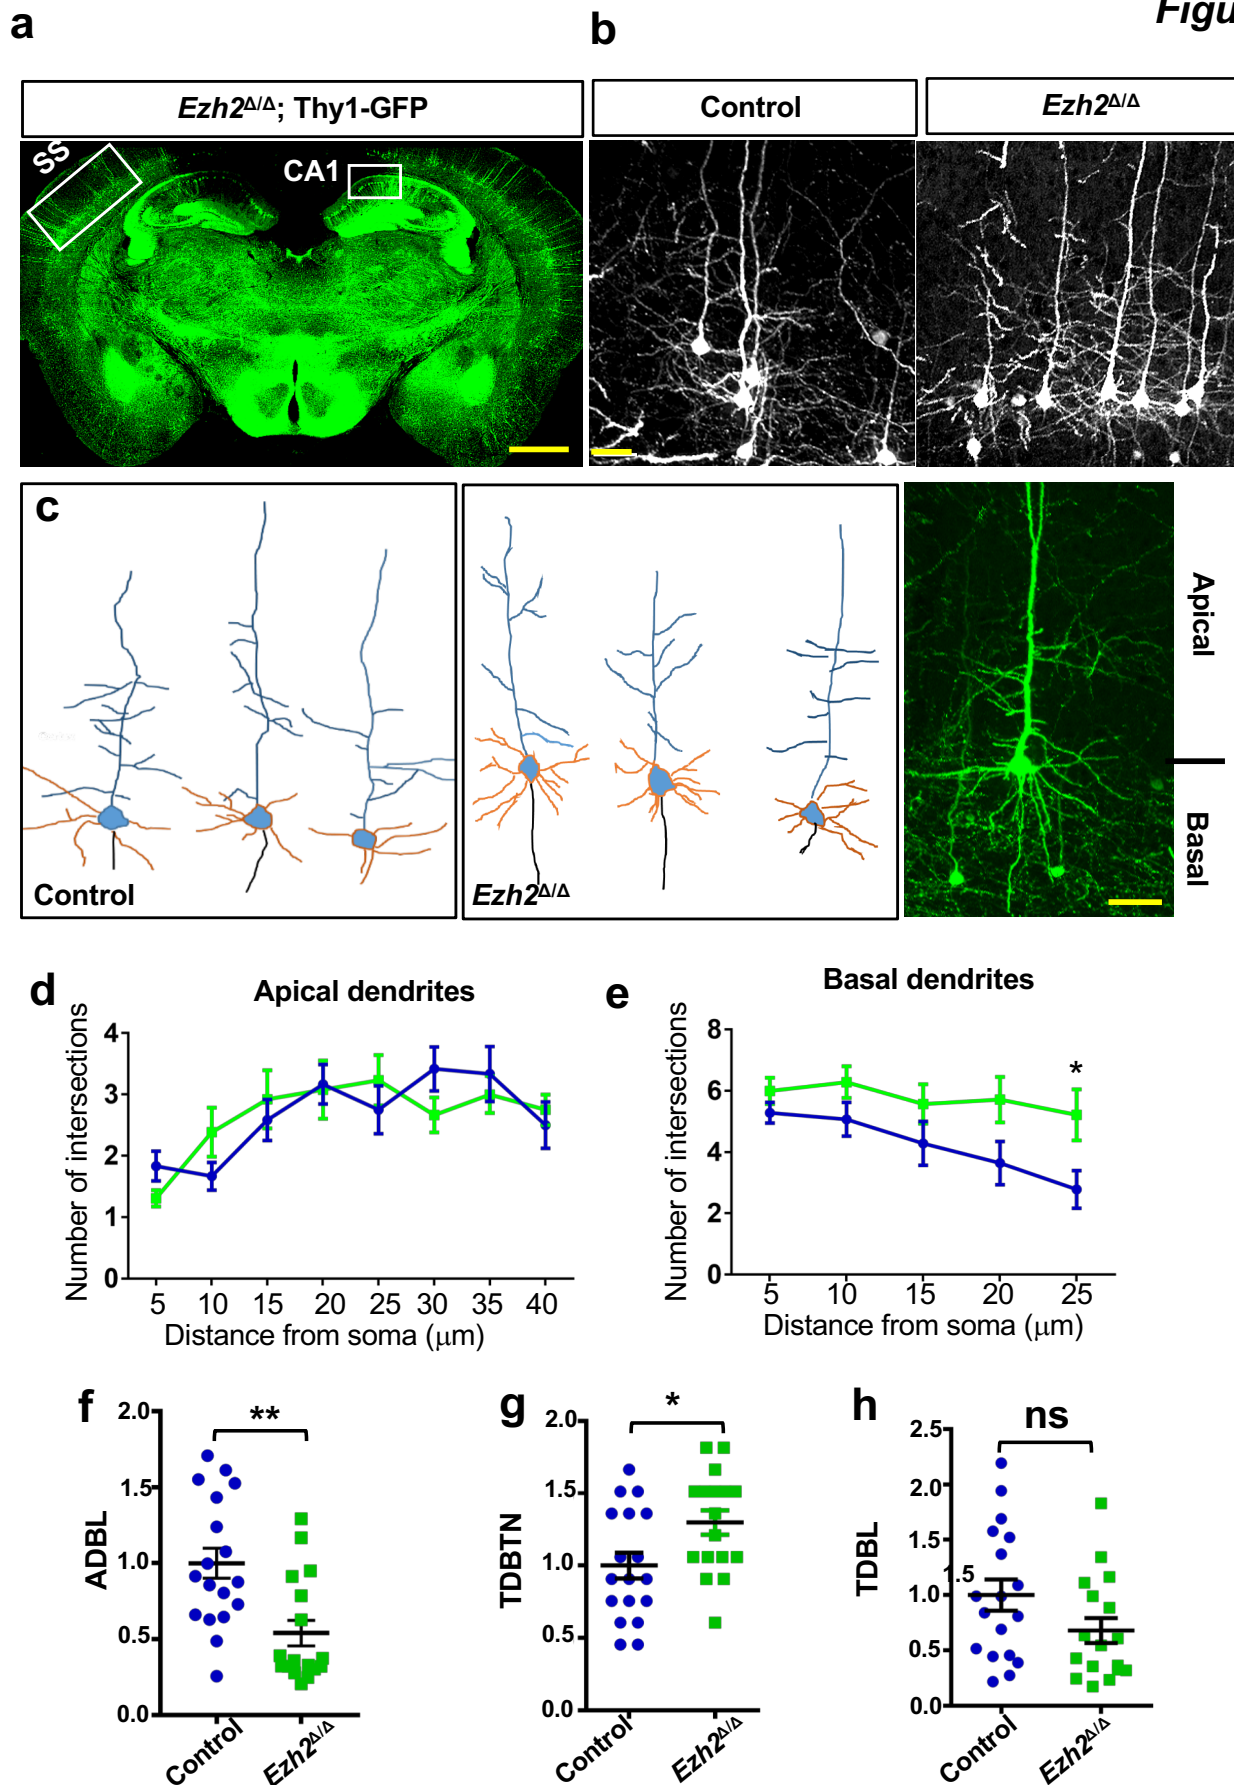

Figure 5

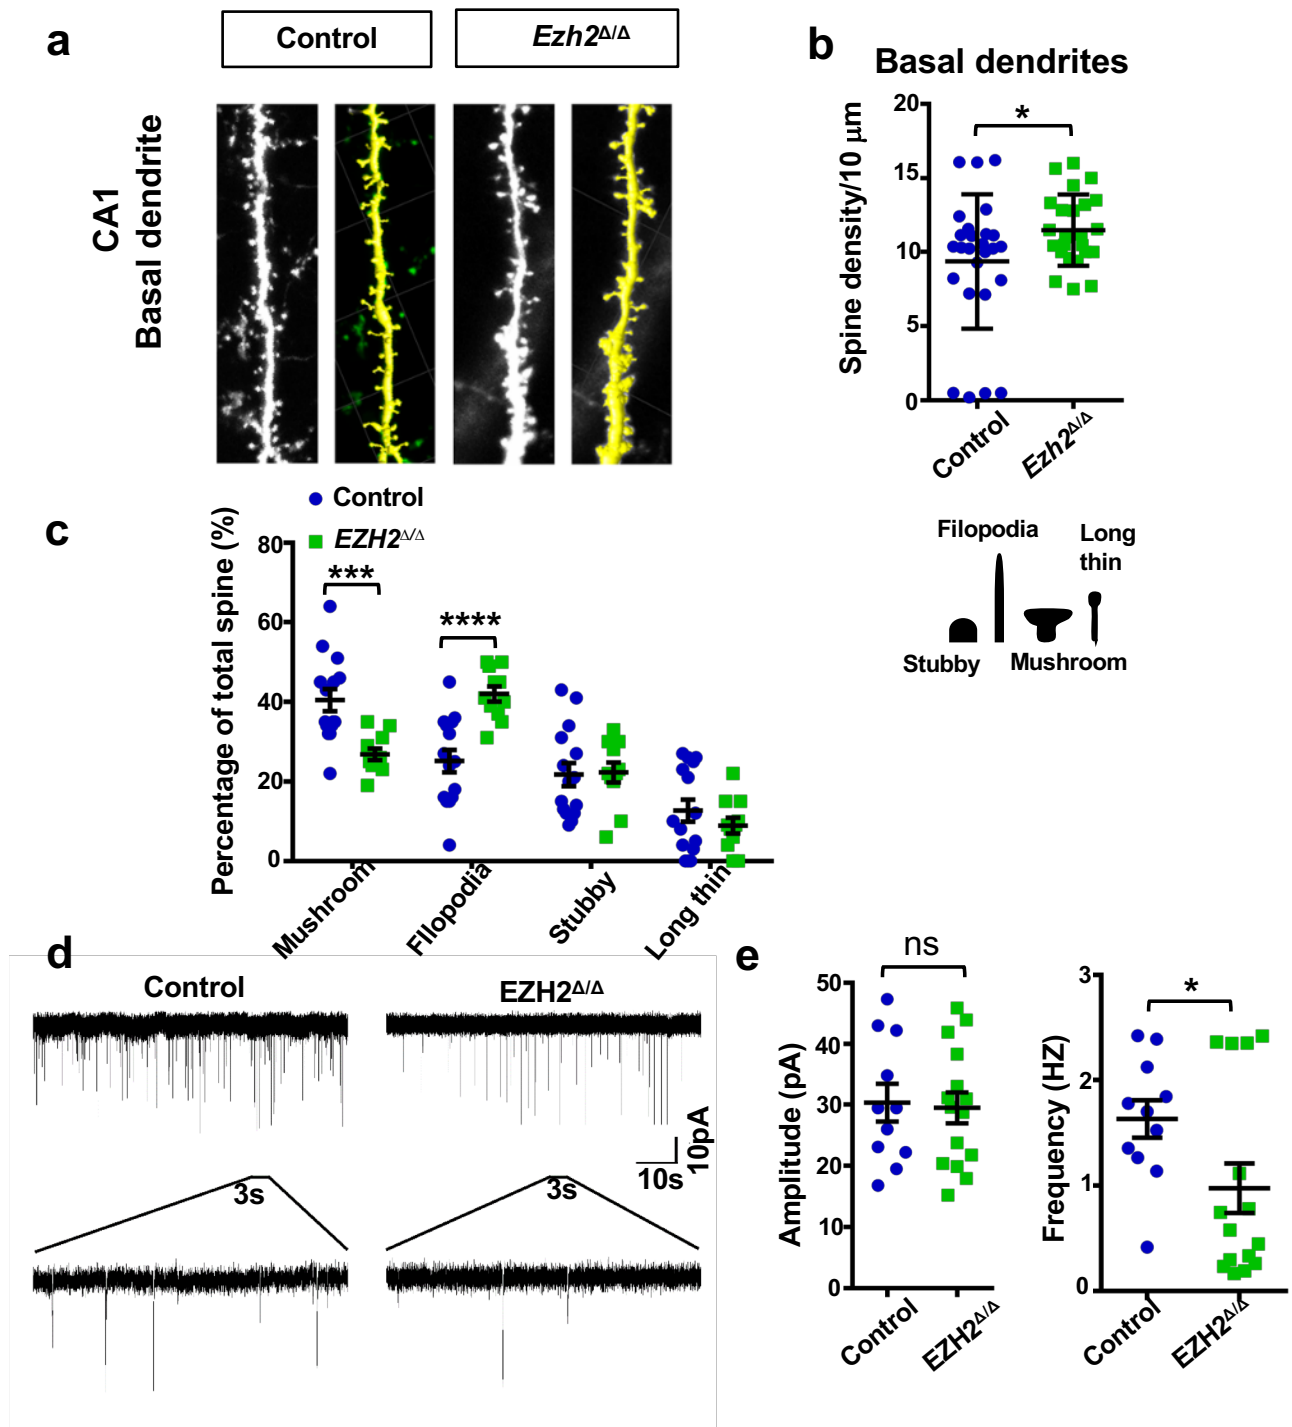

**Figure 6**

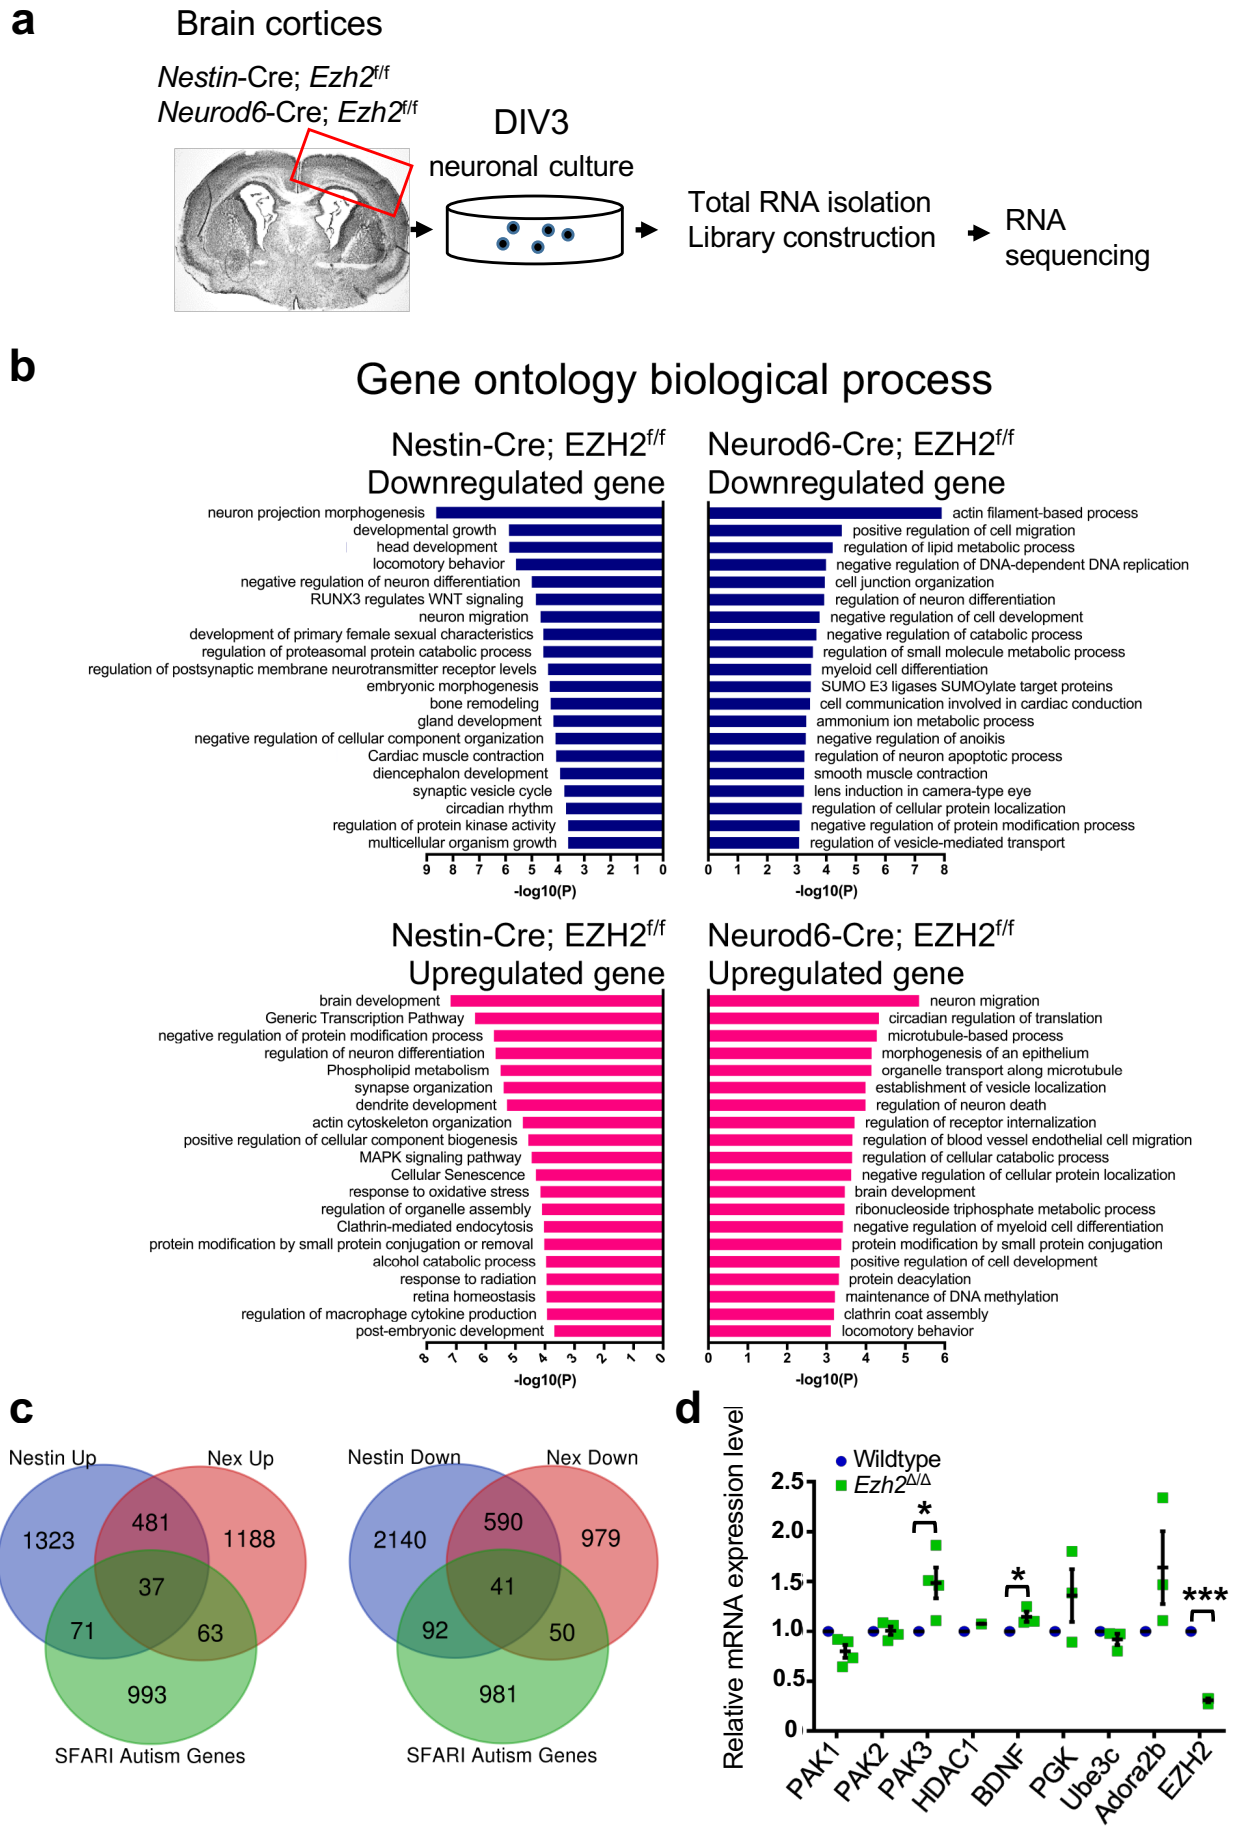

Figure 7

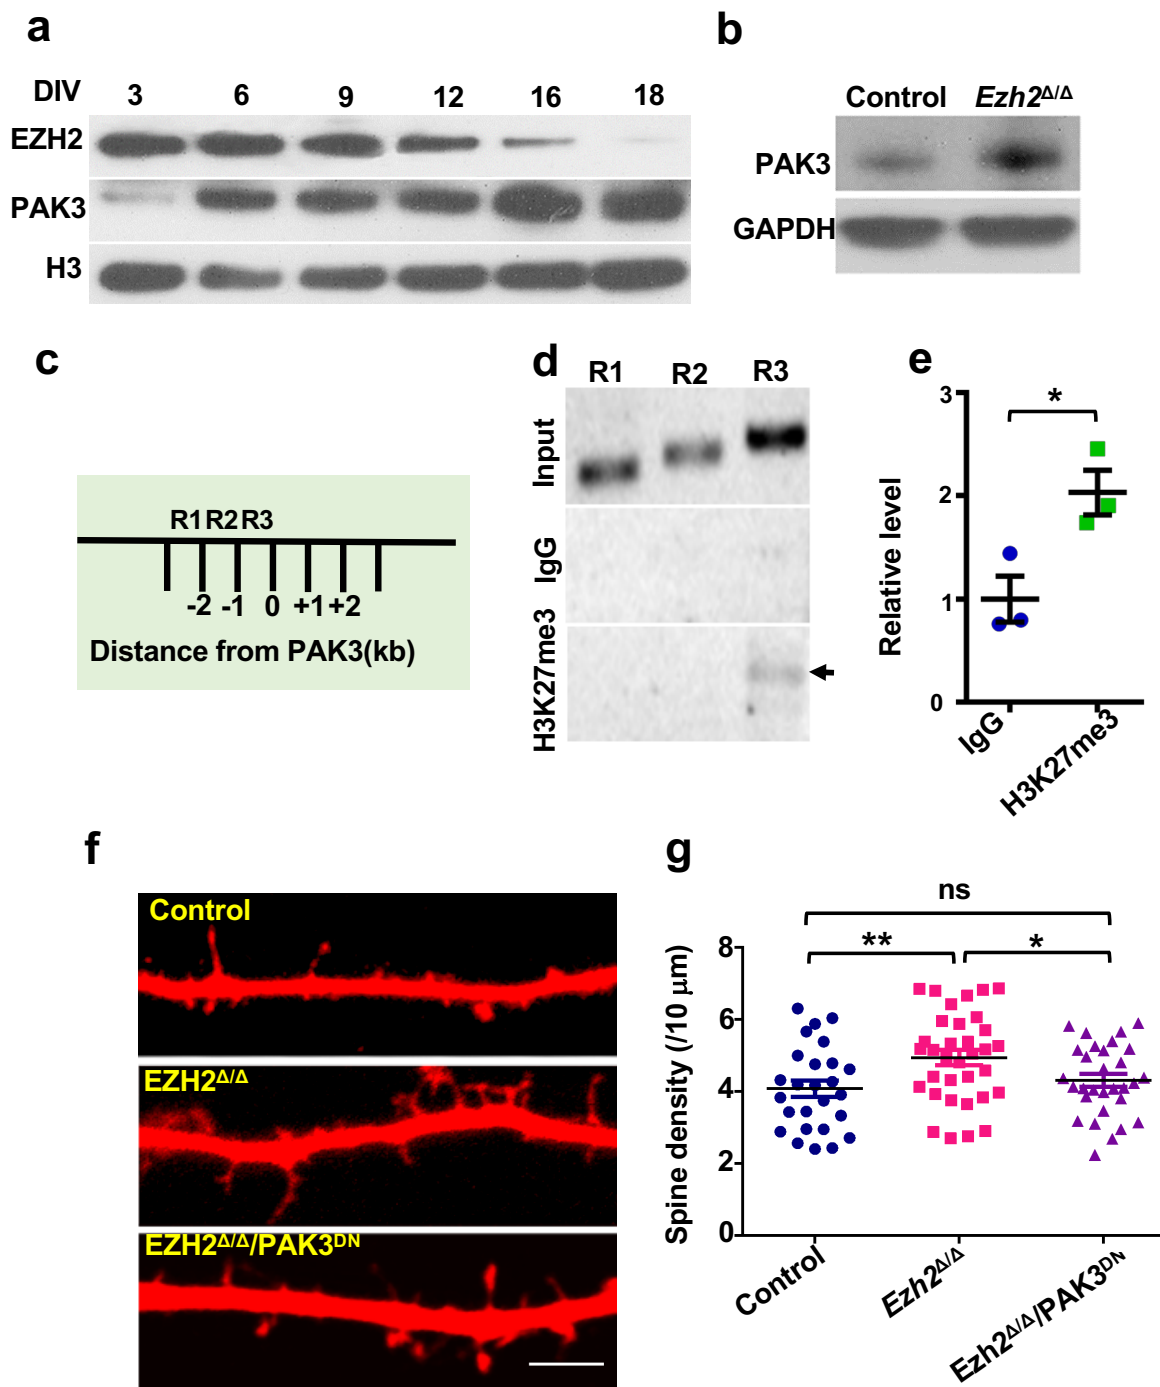

Figure 8

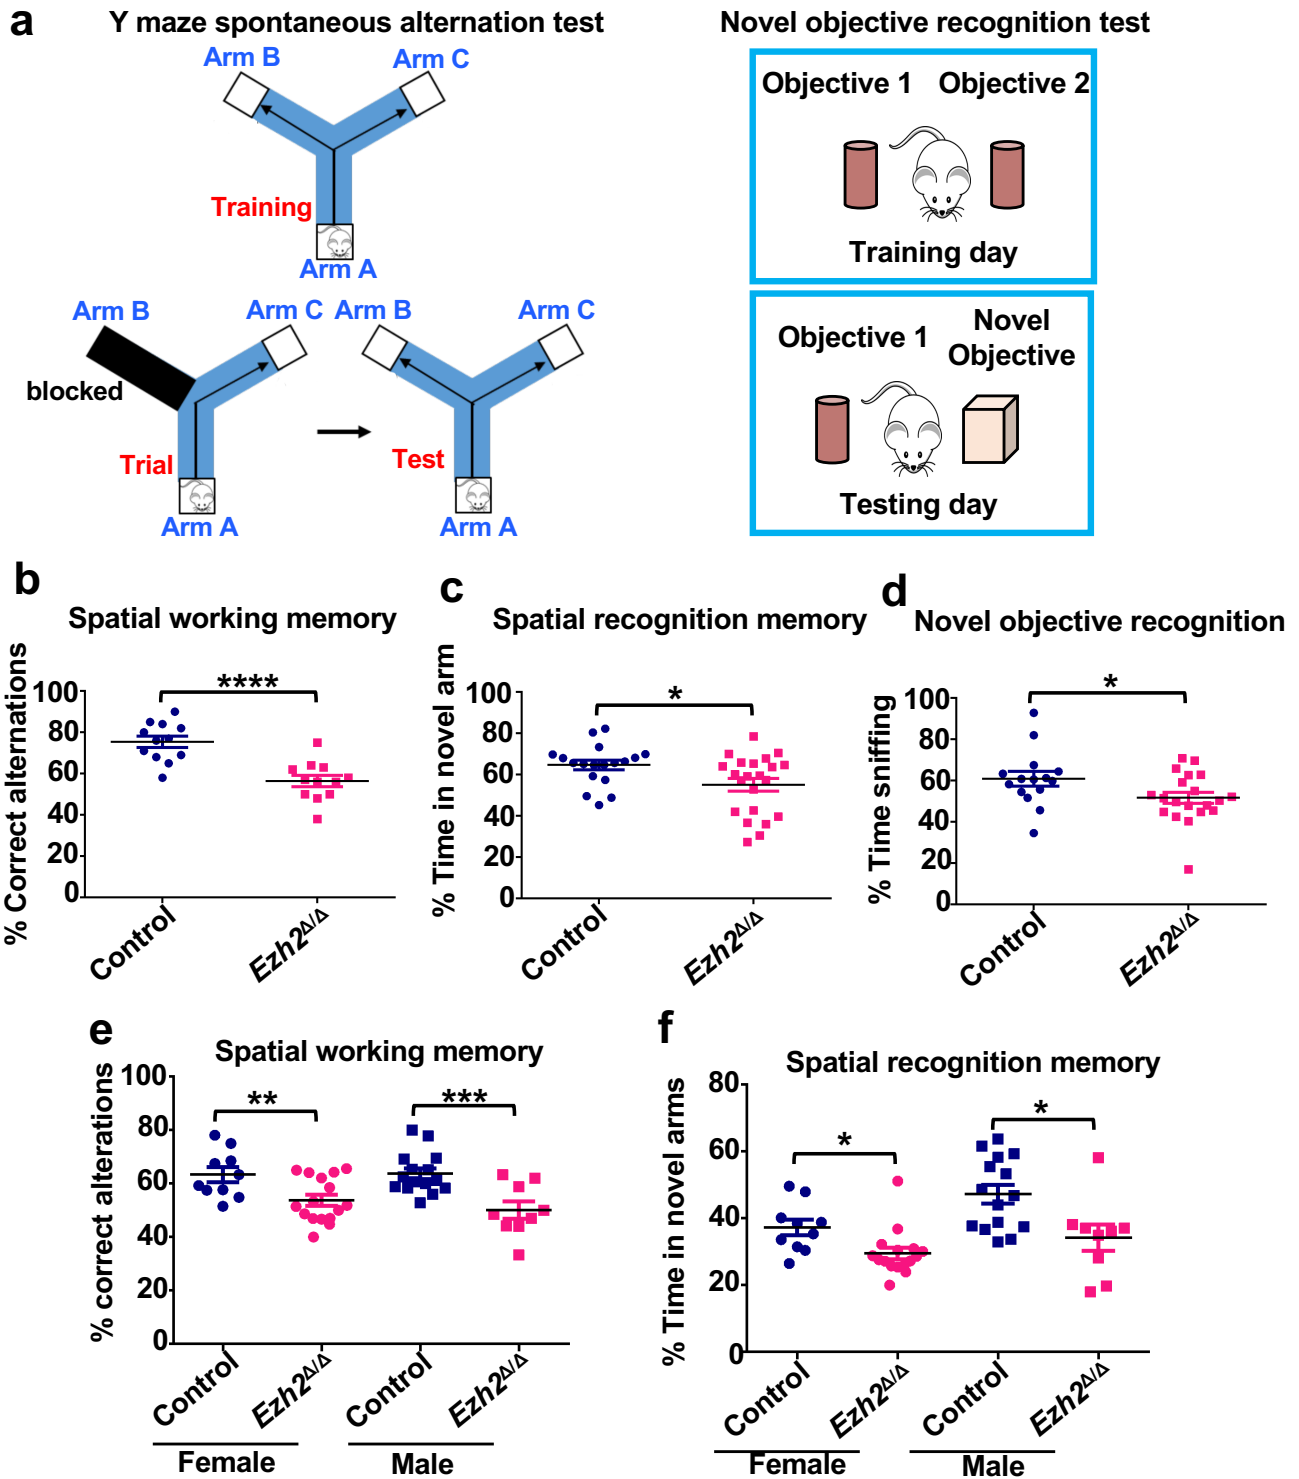

Supplementary Figure S1

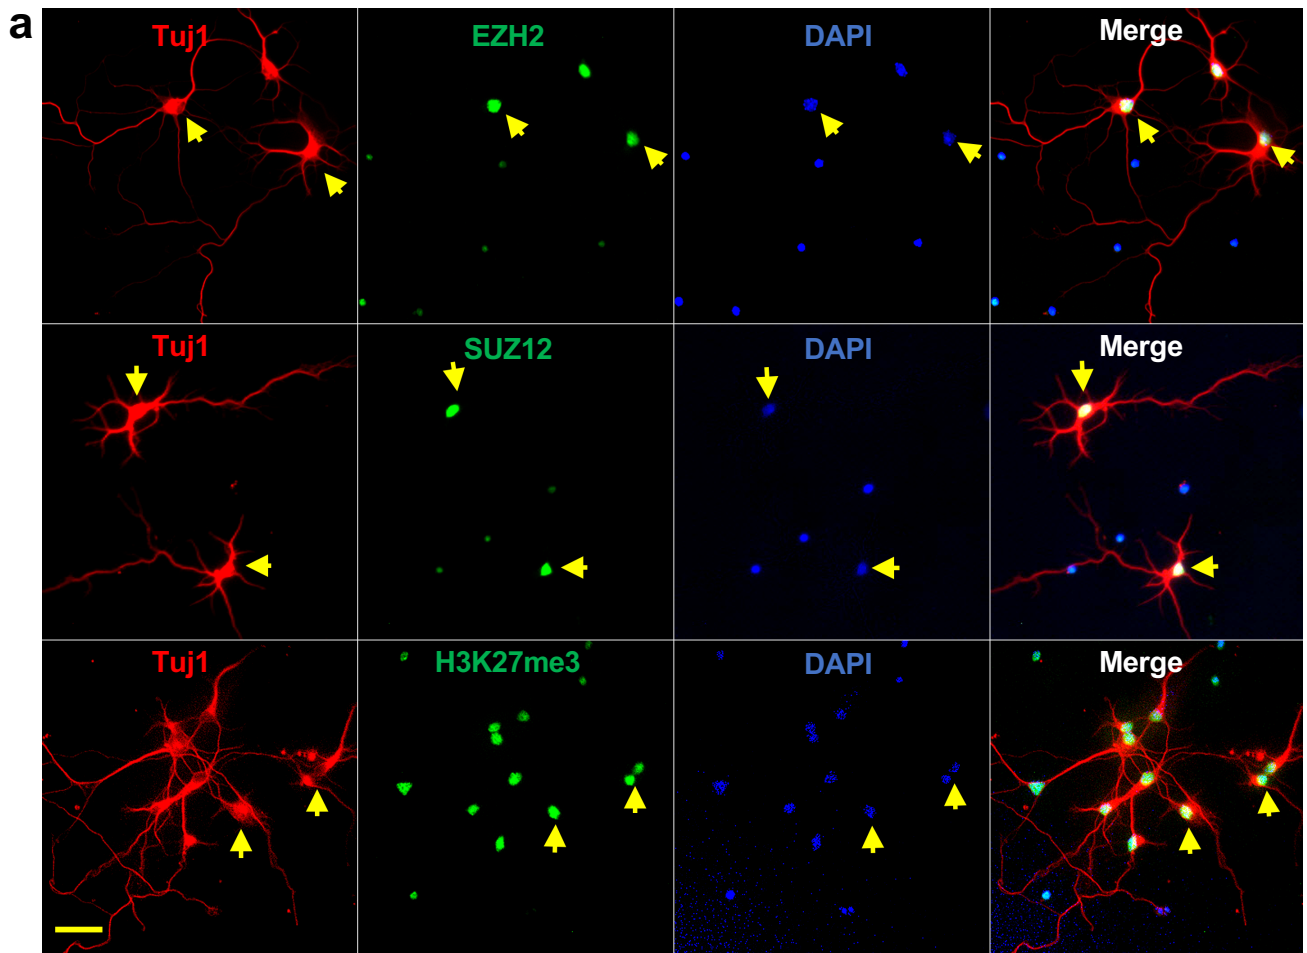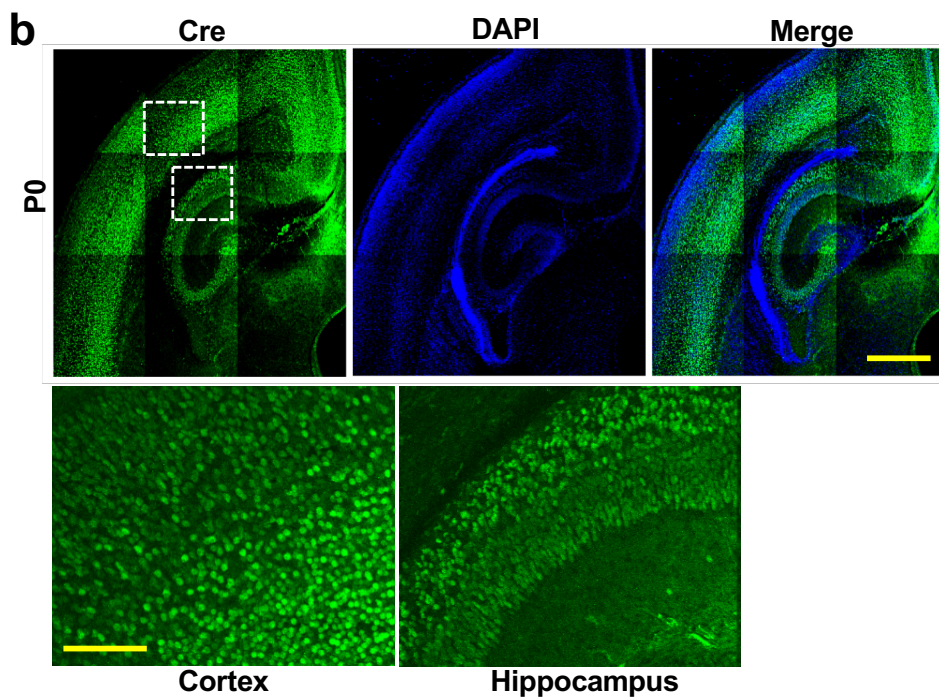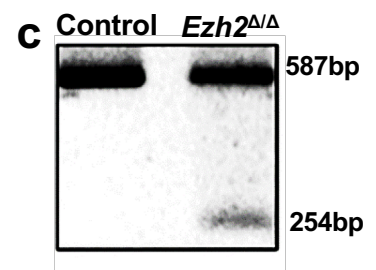

Supplementary Figure S2

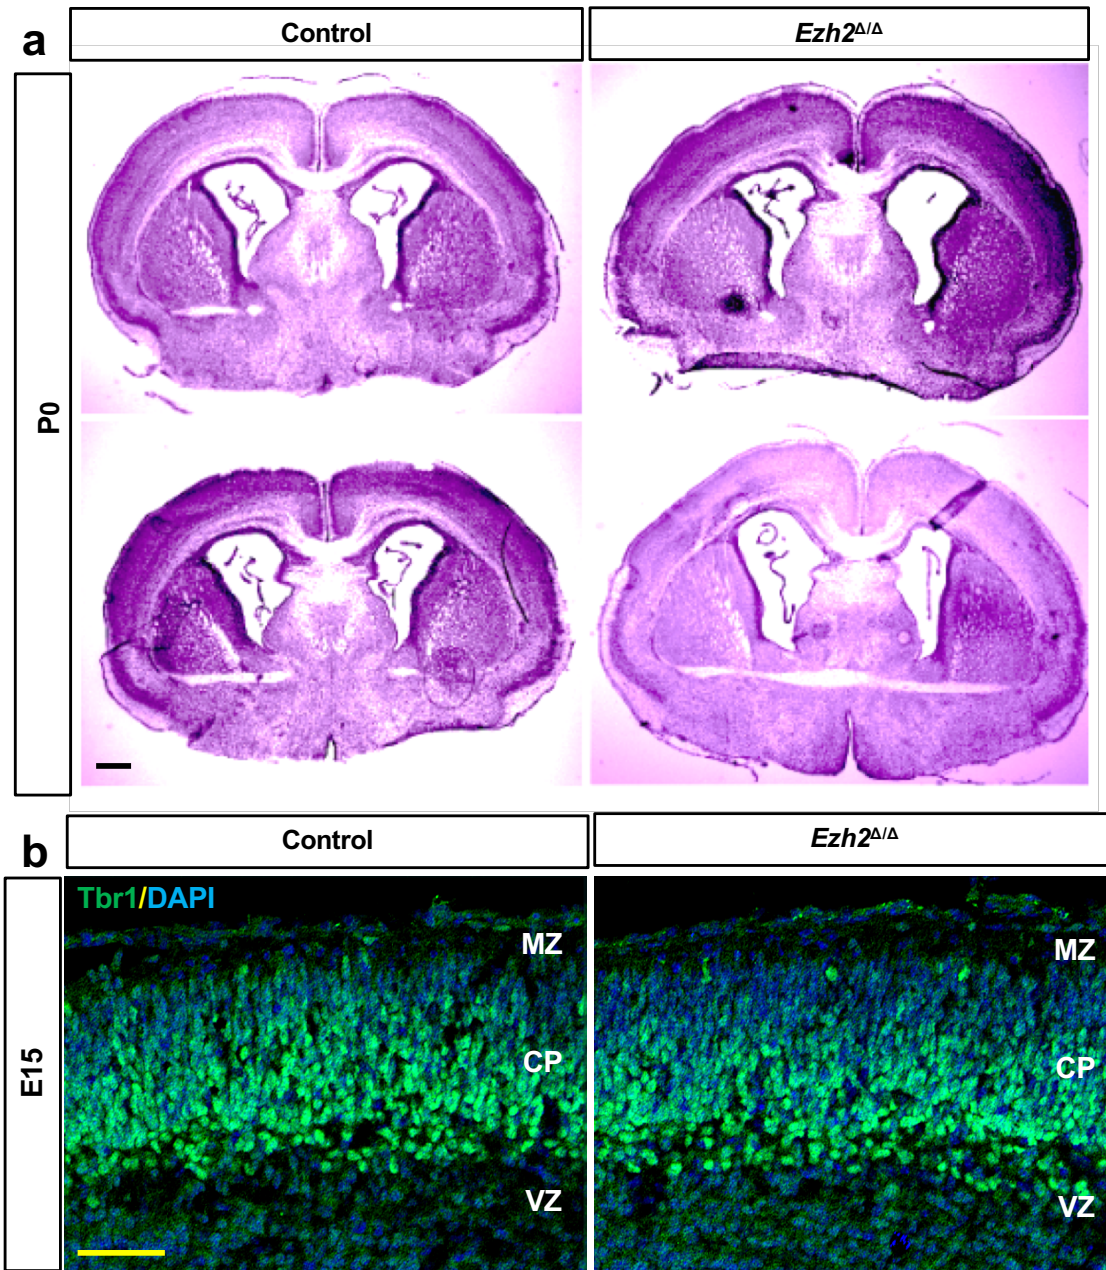

**Supplementary Figure S3**

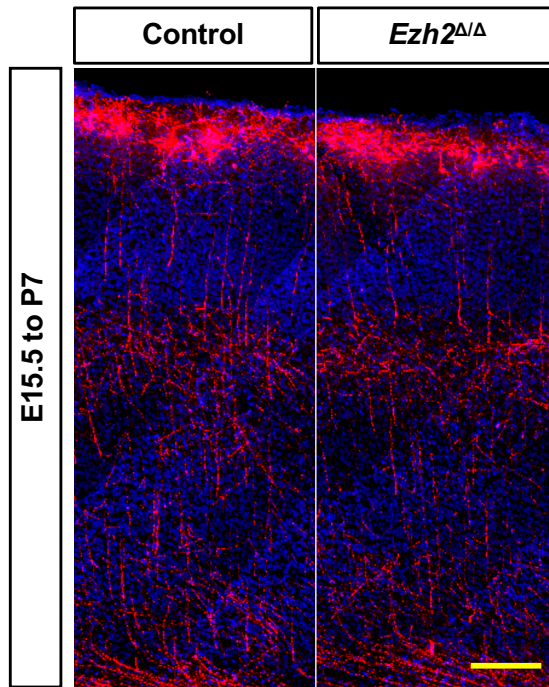



# Supplementary Figure S4

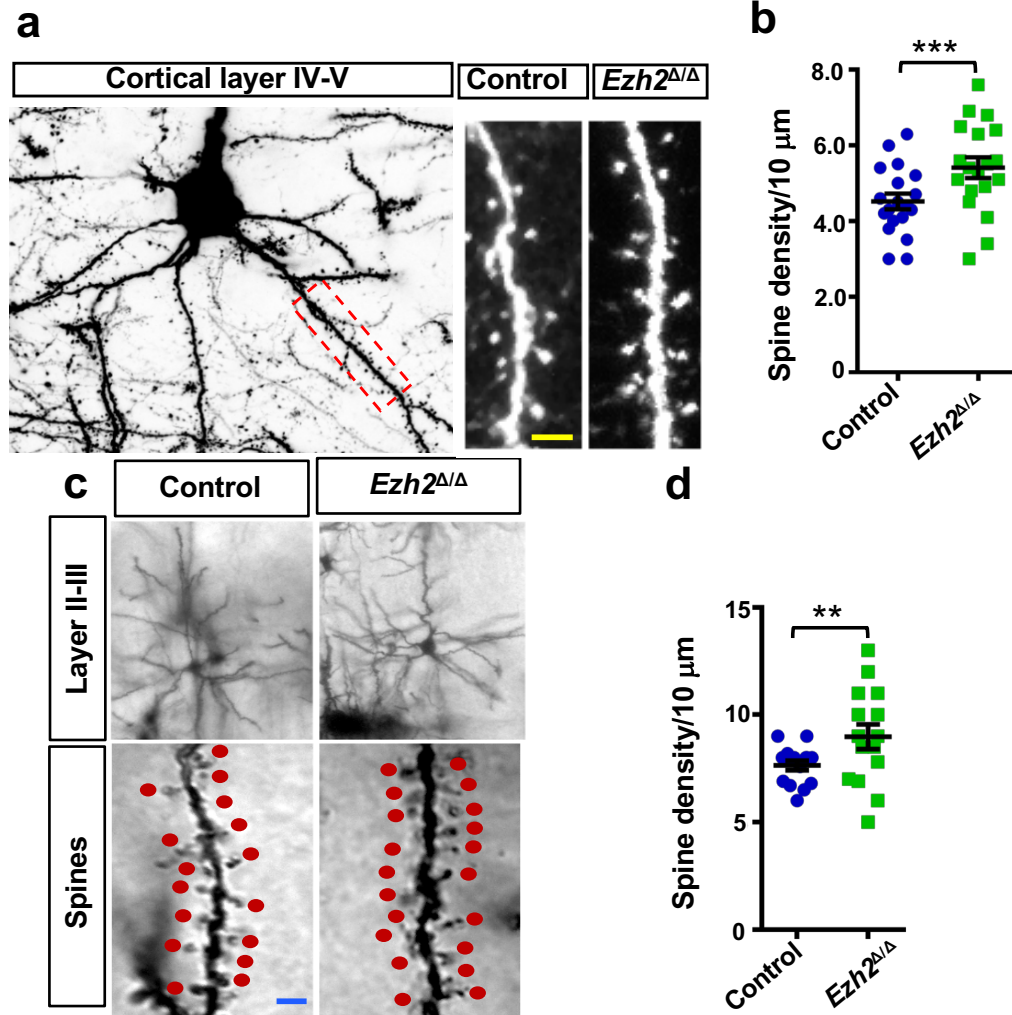

# Supplementary Figure S5

**a**  
Nestin-Cre; EZH2<sup>fl/fl</sup>  
Downregulated gene

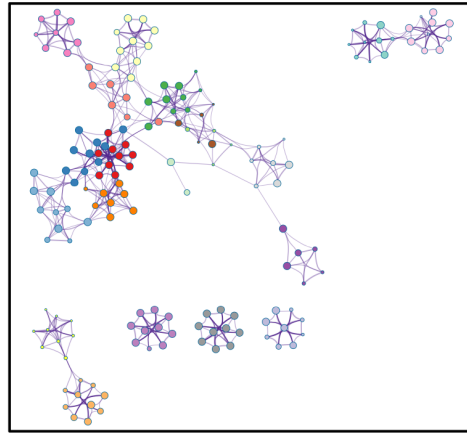

- neuron projection morphogenesis
- developmental growth
- head development
- locomotory behavior
- negative regulation of neuron differentiation
- RUNX3 regulates WNT signaling
- neuron migration
- development of primary female sexual characteristics
- regulation of proteasomal protein catabolic process
- regulation of postsynaptic membrane neurotransmitter release
- embryonic morphogenesis
- bone remodeling
- gland development
- negative regulation of cellular component organization
- Cardiac muscle contraction
- diencephalon development
- synaptic vesicle cycle
- circadian rhythm
- regulation of protein kinase activity
- multicellular organism growth

**b**  
Neurod6-Cre; EZH2<sup>fl/fl</sup>  
Downregulated gene

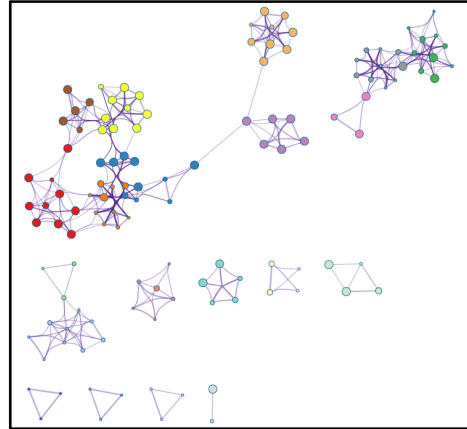

- actin filament-based process
- positive regulation of cell migration
- regulation of lipid metabolic process
- negative regulation of DNA-dependent DNA replication
- cell junction organization
- regulation of neuron differentiation
- negative regulation of cell development
- negative regulation of catabolic process
- regulation of small molecule metabolic process
- myeloid cell differentiation
- SUMO E3 ligases SUMOylate target proteins
- cell communication involved in cardiac conduction
- ammonium ion metabolic process
- negative regulation of anoikis
- regulation of neuron apoptotic process
- smooth muscle contraction
- lens induction in camera-type eye
- regulation of cellular protein localization
- negative regulation of protein modification process
- regulation of vesicle-mediated transport

**c**  
Nestin-Cre; EZH2<sup>fl/fl</sup>  
Upregulated gene

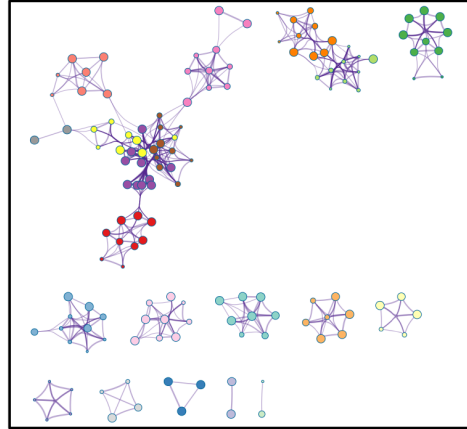

- brain development
- Generic Transcription Pathway
- negative regulation of protein modification process
- regulation of neuron differentiation
- Phospholipid metabolism
- synapse organization
- dendrite development
- actin cytoskeleton organization
- positive regulation of cellular component biogenesis
- MAPK signaling pathway
- Cellular Senescence
- response to oxidative stress
- regulation of organelle assembly
- Clathrin-mediated endocytosis
- protein modification by small protein conjugation or modification
- alcohol catabolic process
- response to radiation
- retina homeostasis
- regulation of macrophage cytokine production
- post-embryonic development

**d**  
Neurod6-Cre; EZH2<sup>fl/fl</sup>  
Upregulated gene

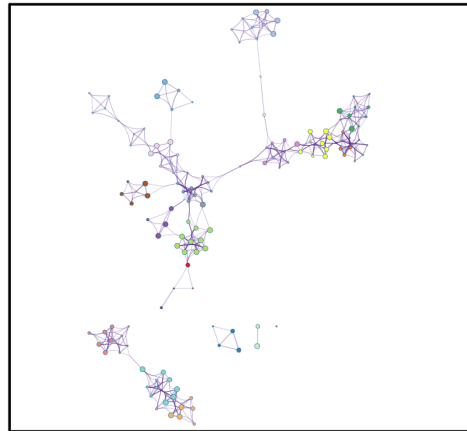

- neuron migration
- circadian regulation of translation
- microtubule-based process
- morphogenesis of an epithelium
- organelle transport along microtubule
- establishment of vesicle localization
- regulation of neuron death
- regulation of receptor internalization
- regulation of blood vessel endothelial cell migration
- regulation of cellular catabolic process
- negative regulation of cellular protein localization
- brain development
- ribonucleoside triphosphate metabolic process
- negative regulation of myeloid cell differentiation
- protein modification by small protein conjugation
- positive regulation of cell development
- protein deacylation
- maintenance of DNA methylation
- clathrin coat assembly
- locomotory behavior

Supplementary Figure S6

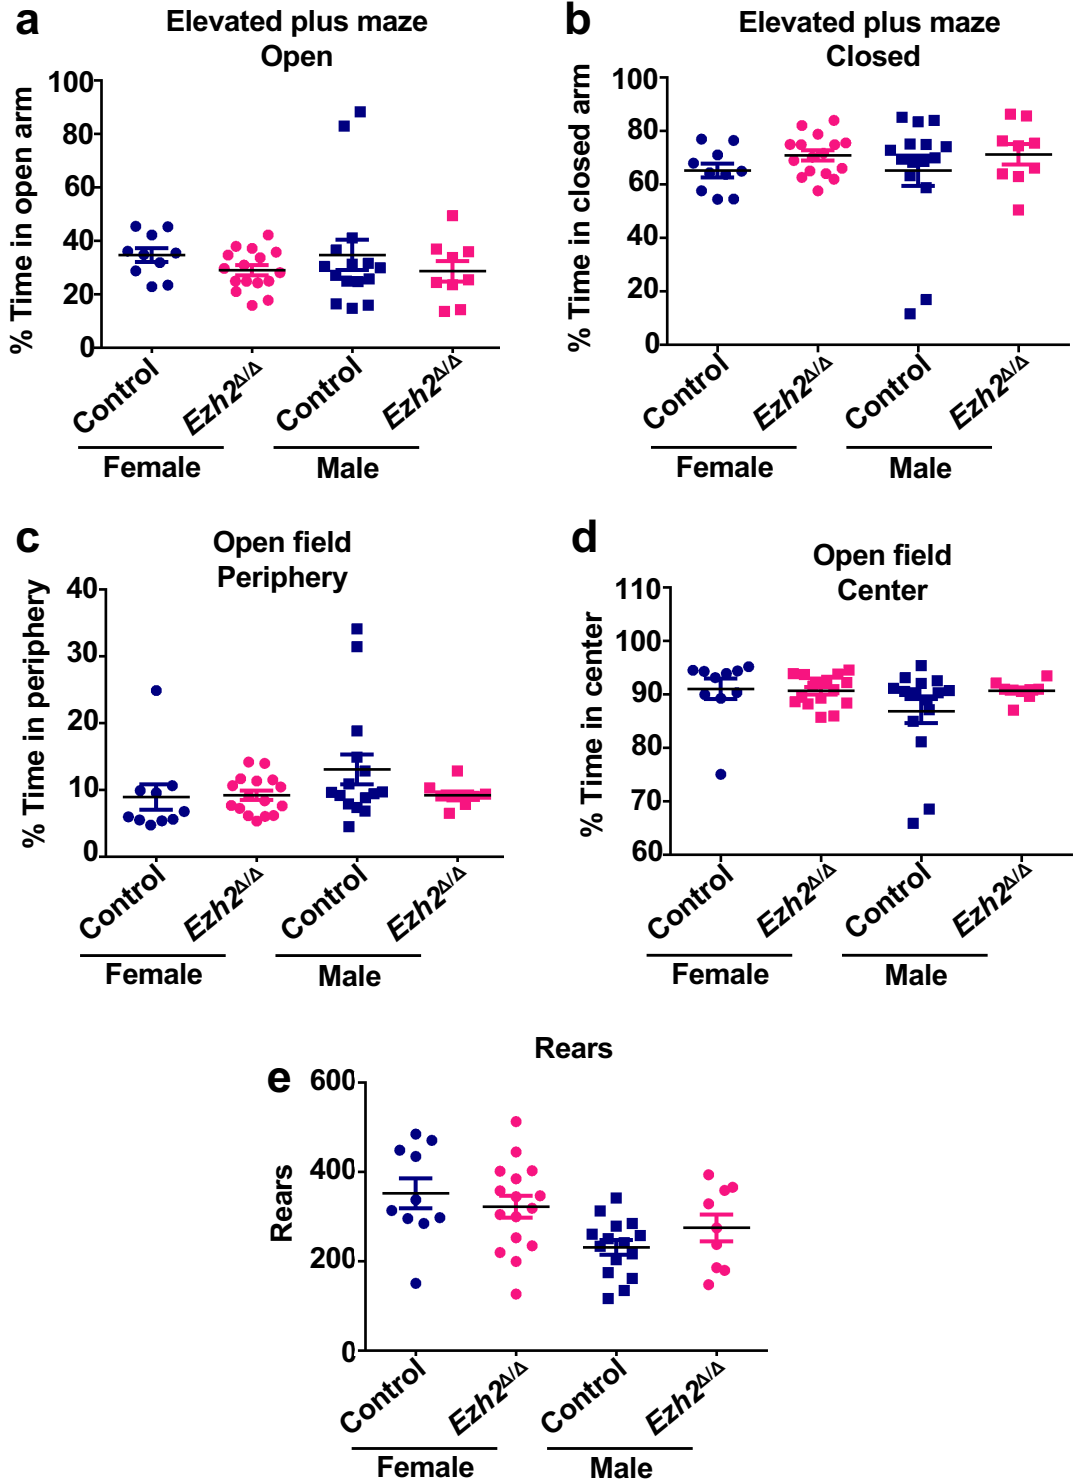

Source: https://www.biorxiv.org/content/10.1101/582908v1.full.pdf
